# Supplementary material
Source: PubMed Central journal article supplement (PMC4643205)
Supplement: mmc1.pdf [file mmc1.pdf]

## Supplemental information

(3 Schemes, 4 figures with multiple panels, 10 tables)

### Miscibility of Sphingomyelins and Phosphatidylcholines in Unsaturated Phosphatidylcholine Bilayers

Anders Kullberg, Oscar Oz Ekholm and J.Peter Slotte\*

*Biochemistry, Faculty of Science and Engineering, Åbo Akademi University, 20520 Turku, Finland*

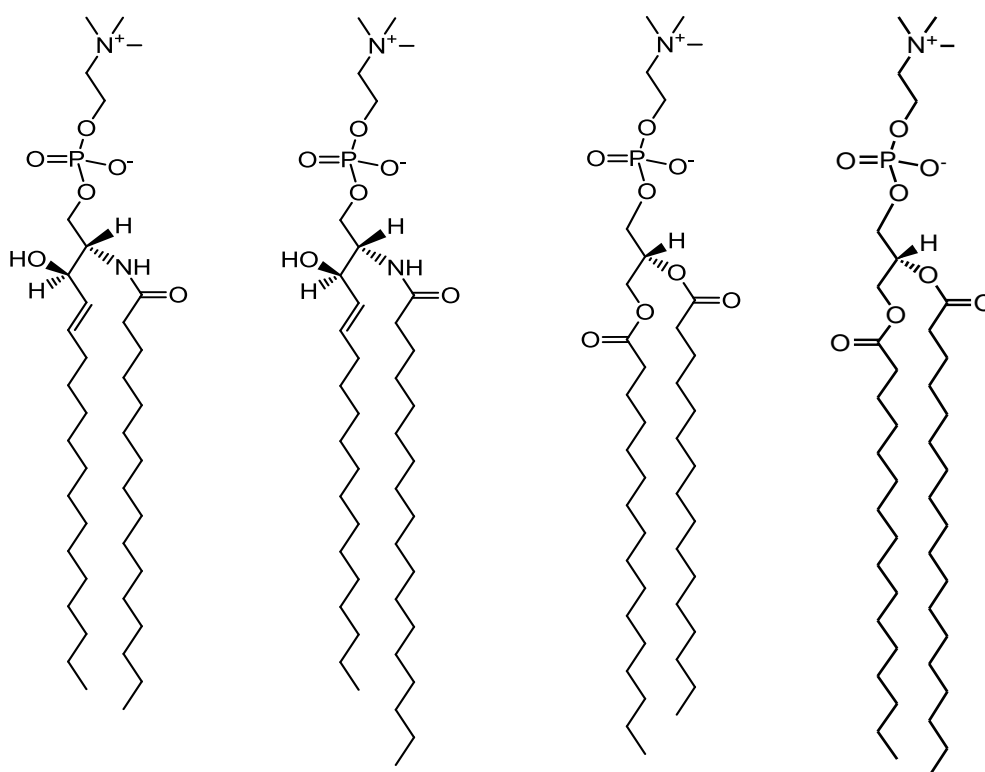

Scheme S1. Molecular structures of (from left to right) PSM, SSM, DPPC, and PSPC

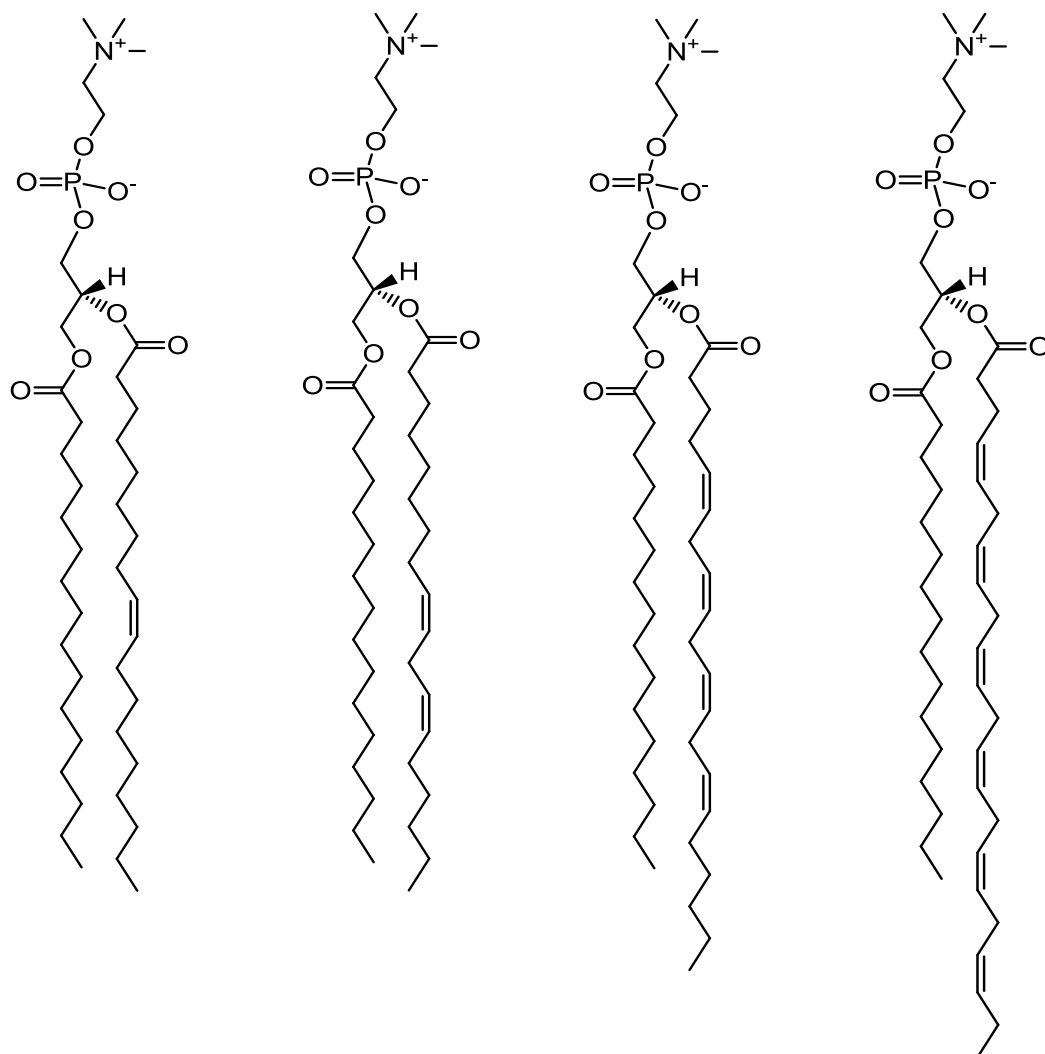

Scheme S2. Molecular structures of (from left to right) POPC, PLPC, PAPC and PDPC

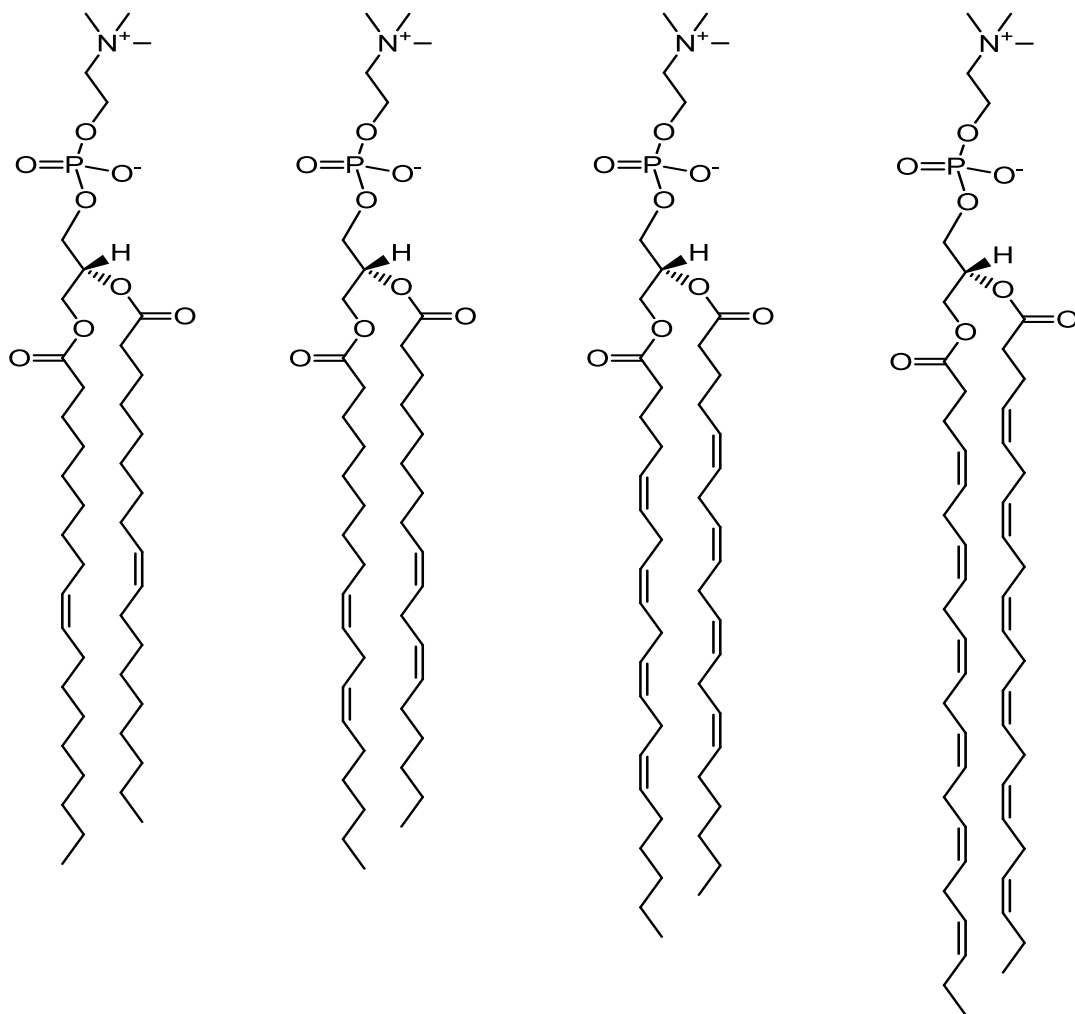

Scheme S3. Molecular structures of (from left to right) DOPC, DLPC, DAPC and DDPc

Figure S1. The longest lifetime component ( $\tau_1$ ) of tPA is given for pure PSM (filled symbols, and for PSM in unsaturated phosphatidylcholine bilayers (open symbols).

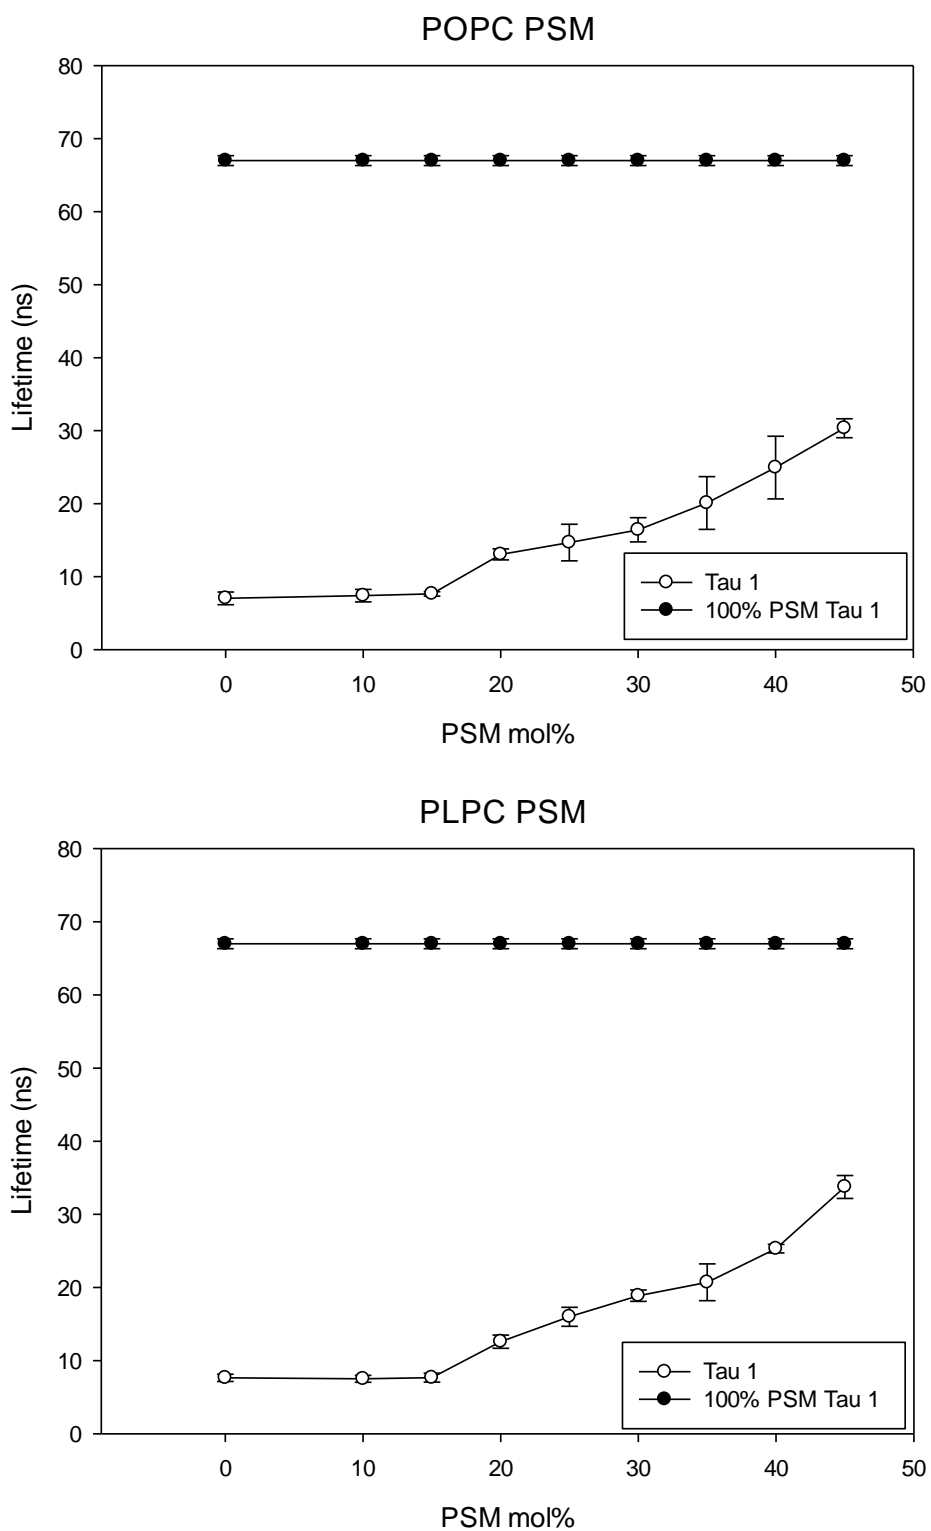

PAPC PSM

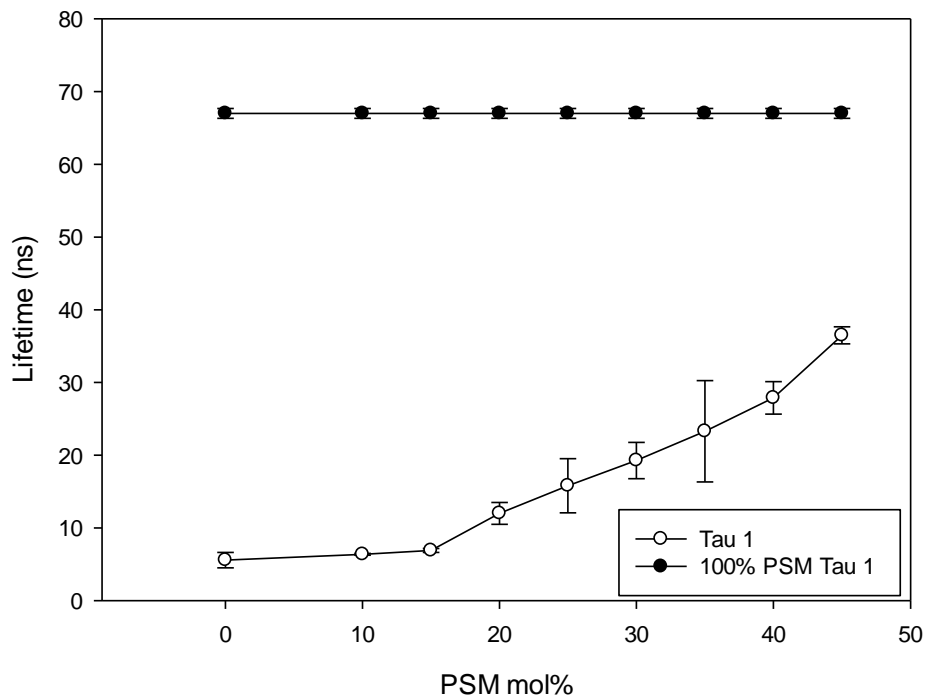

PDPC PSM

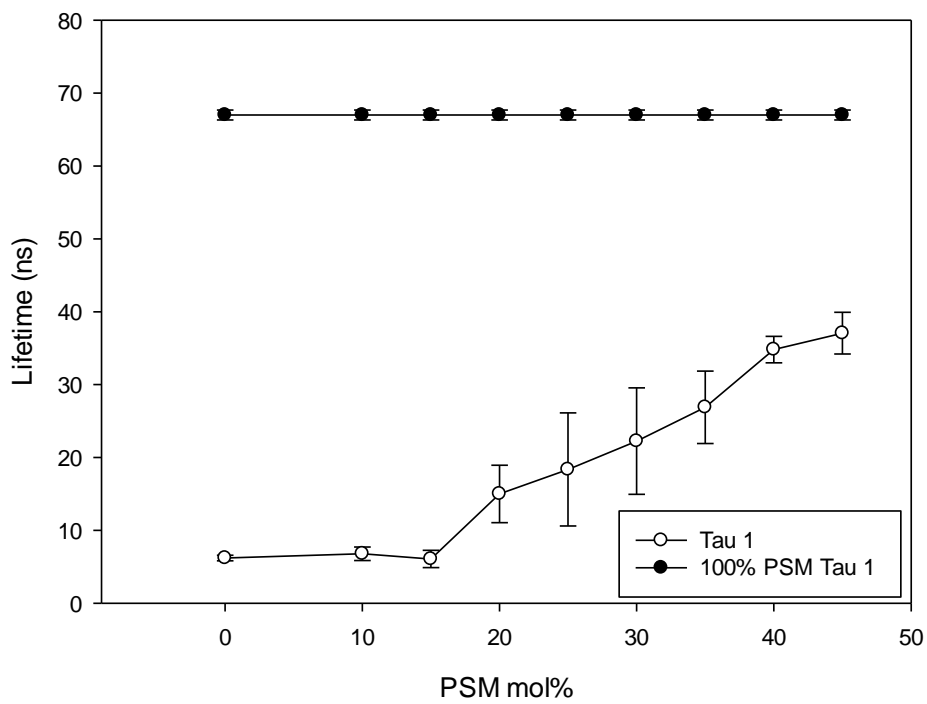

### DOPC PSM

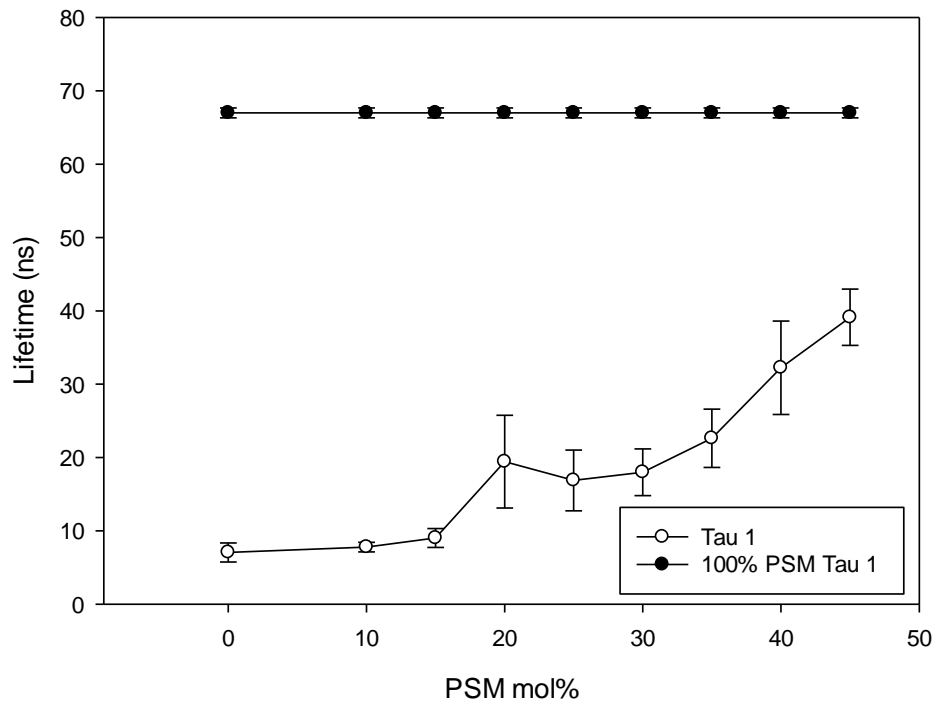

### DLPC PSM

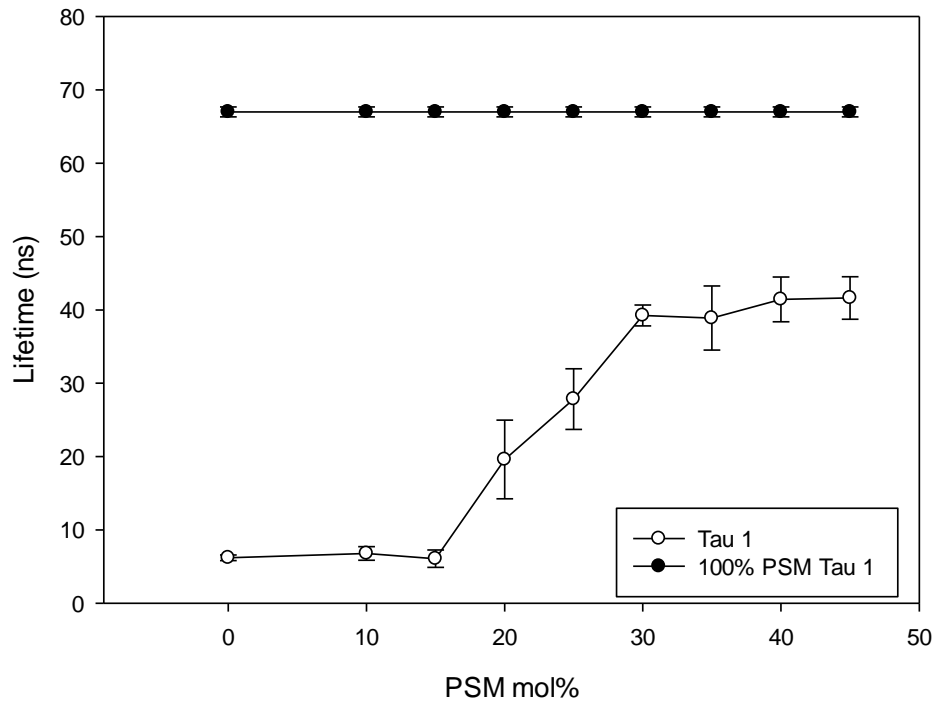

### DAPC PSM

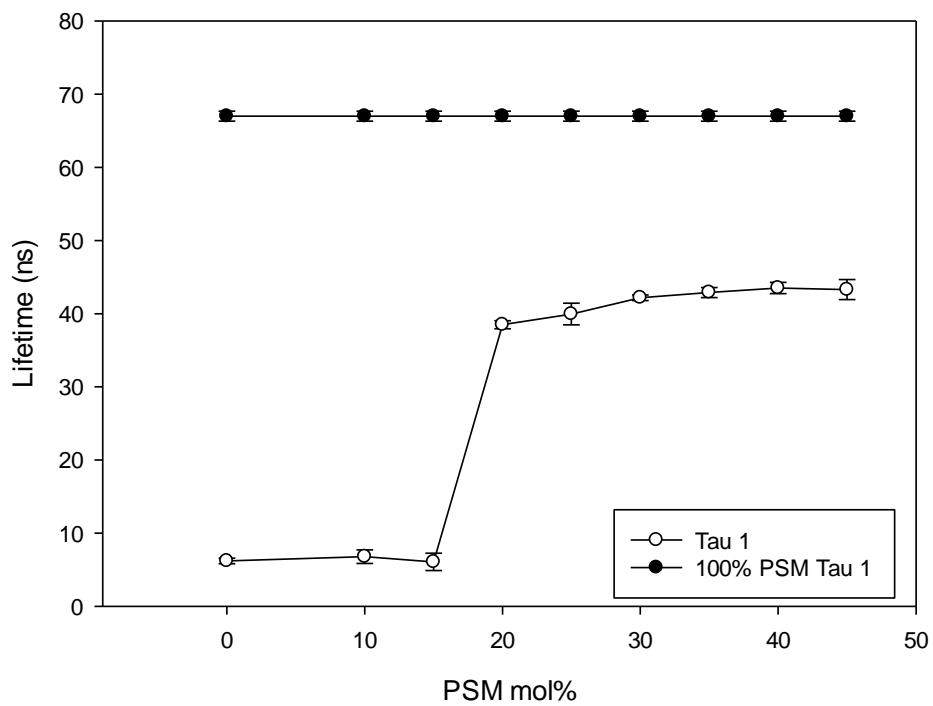

### DDPC PSM

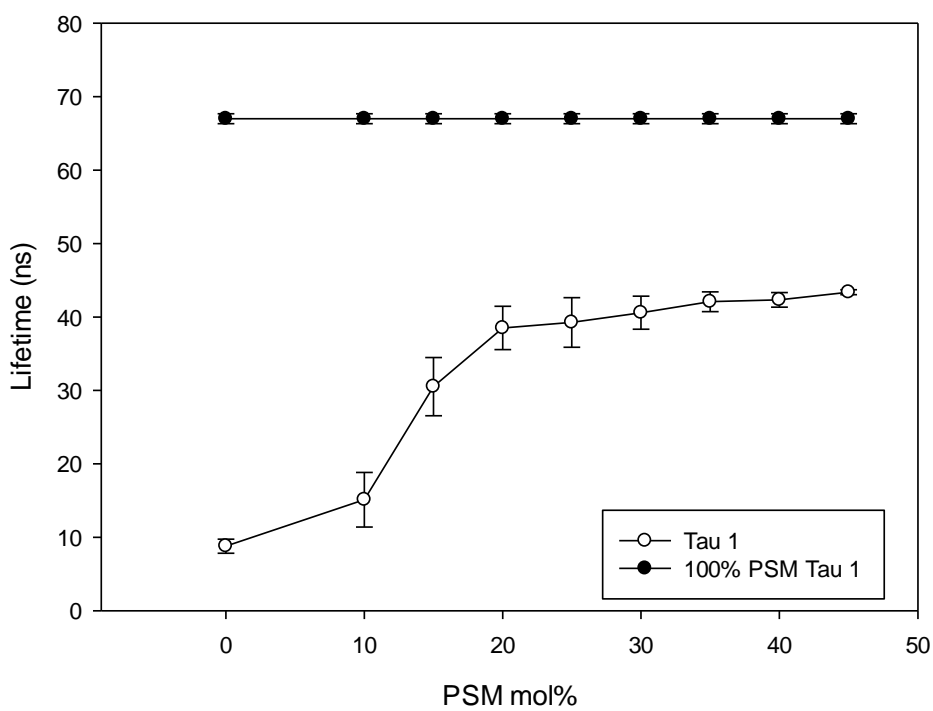

Figure S2. The longest lifetime component ( $\tau_1$ ) of tPA is given for pure DPPC (filled symbols), and for DPPC in unsaturated phosphatidylcholine bilayers (open symbols).

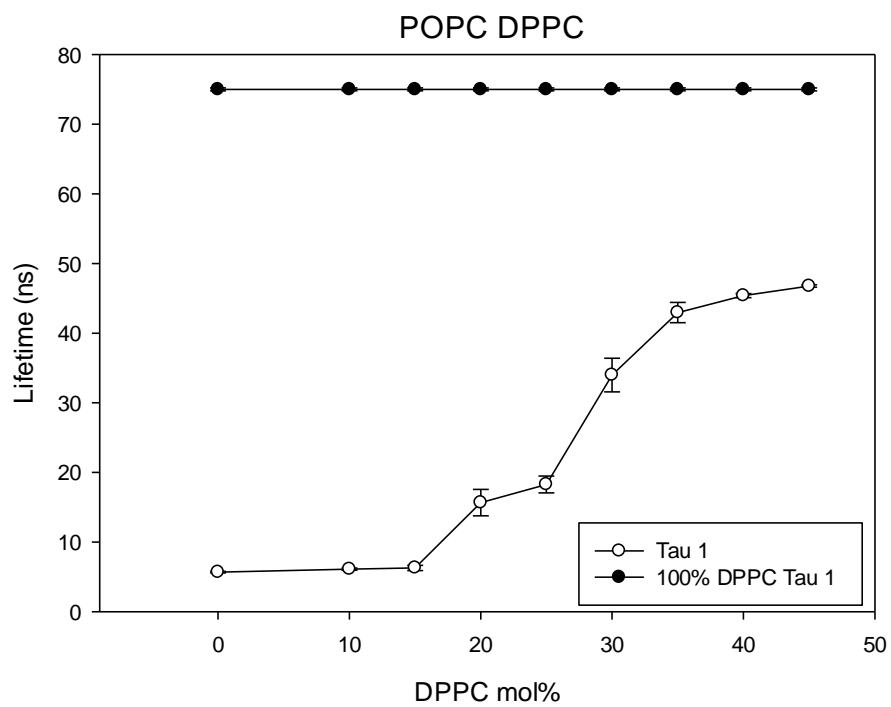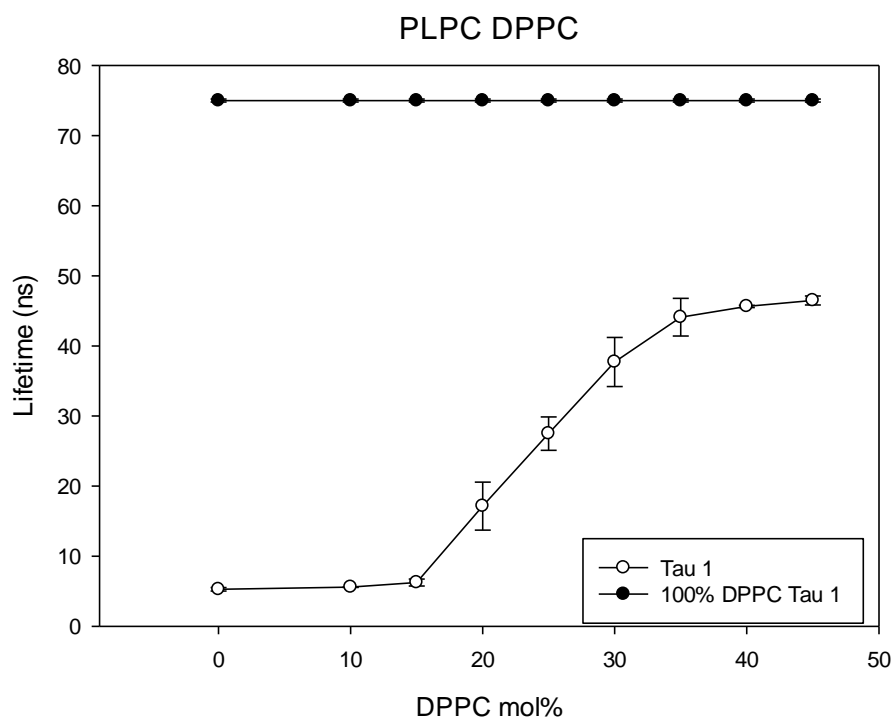



PAPC DPPC

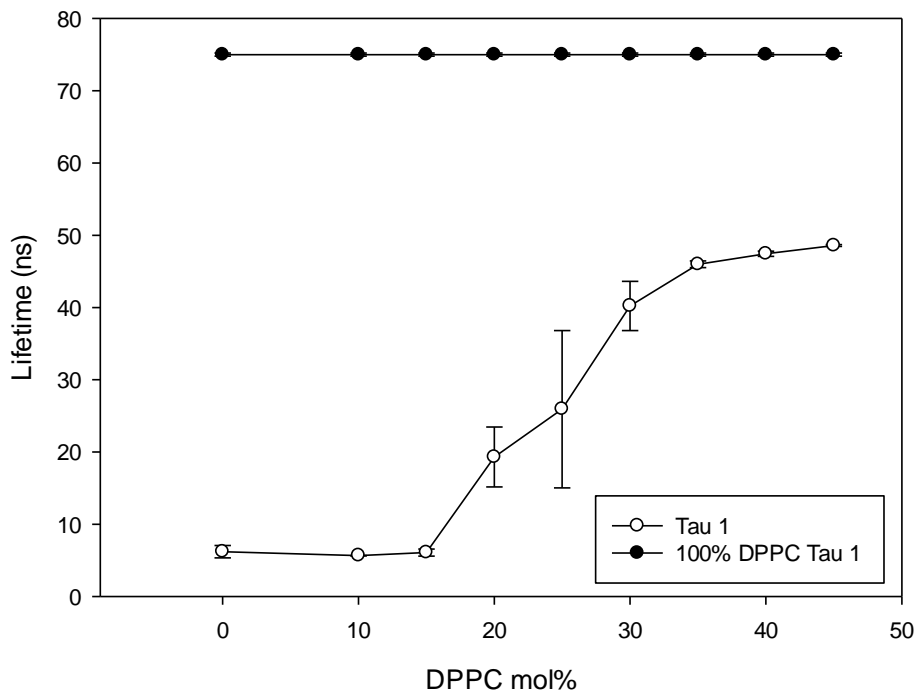

PDPC DPPC

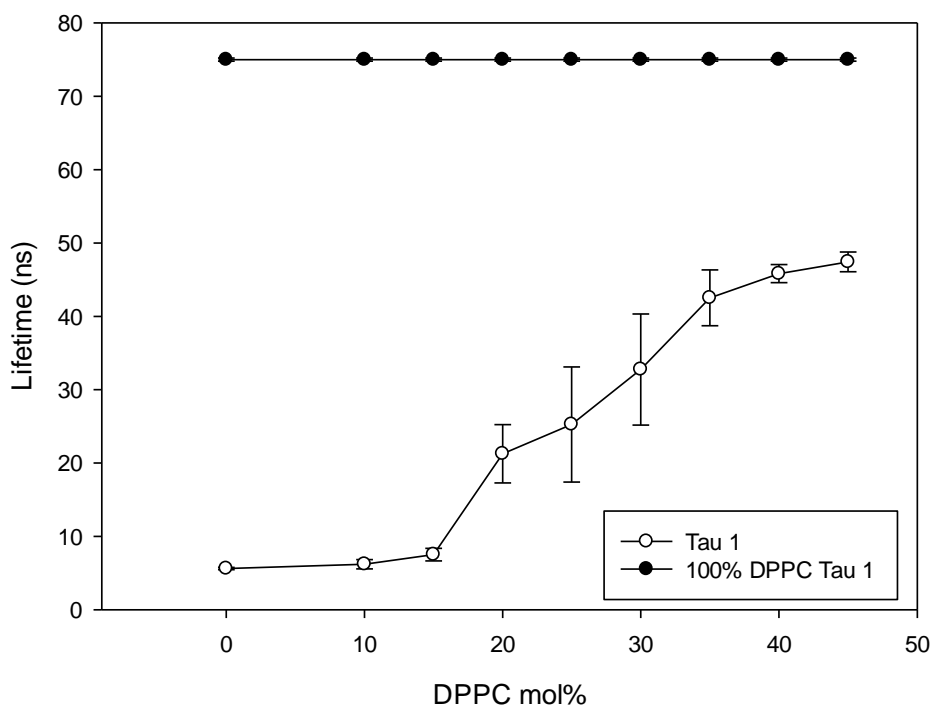

DOPC DPPC

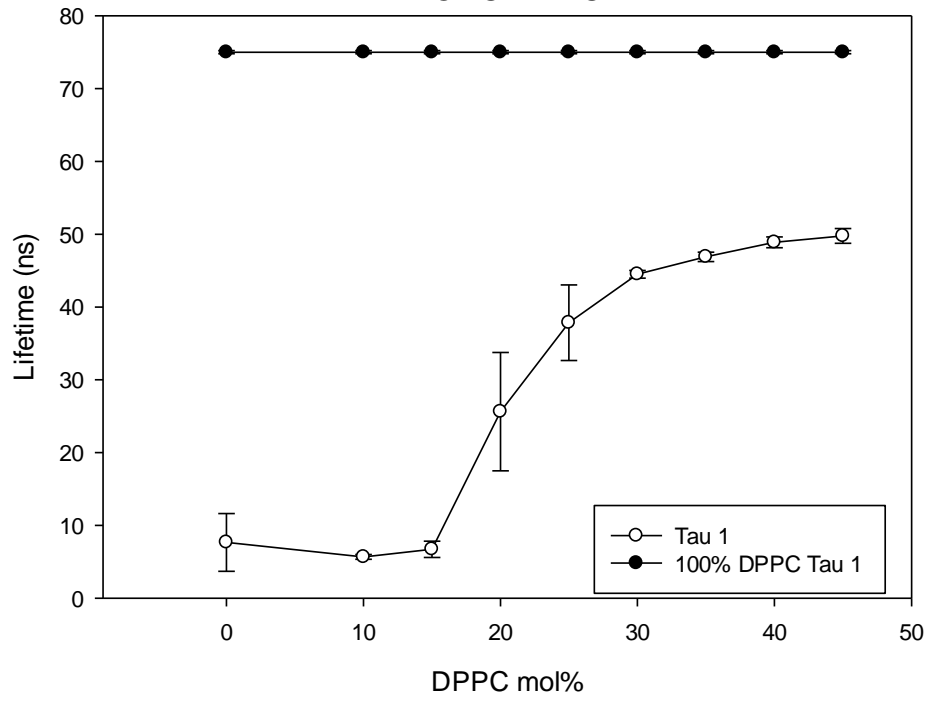

DLPC DPPC

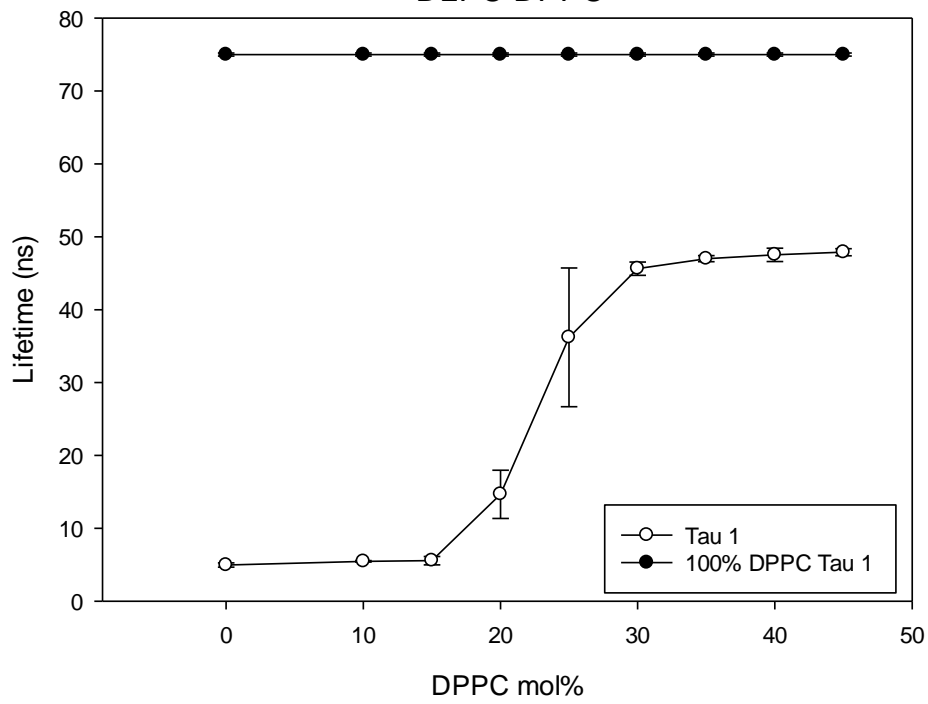

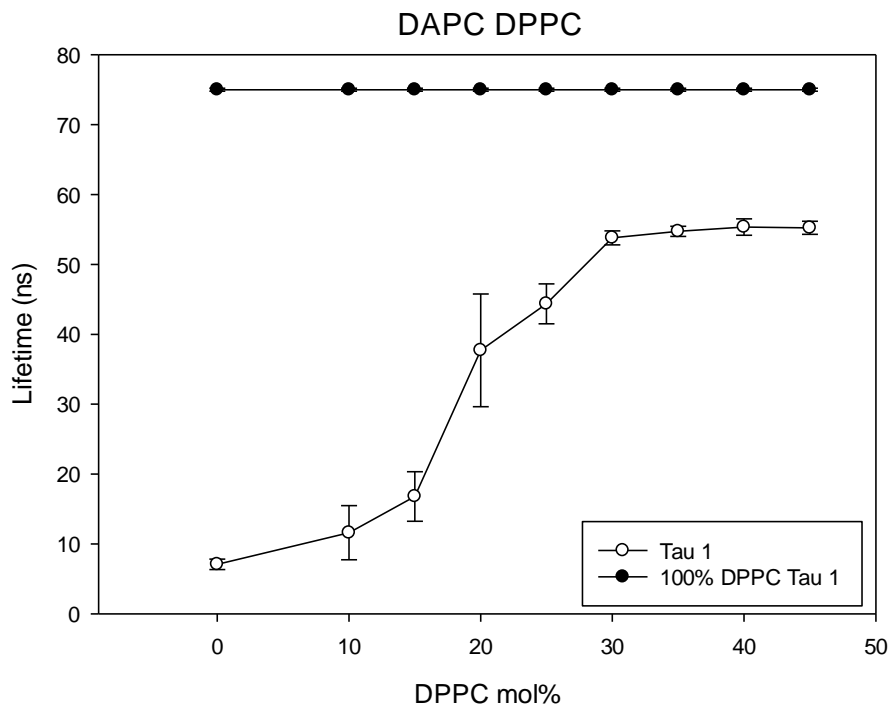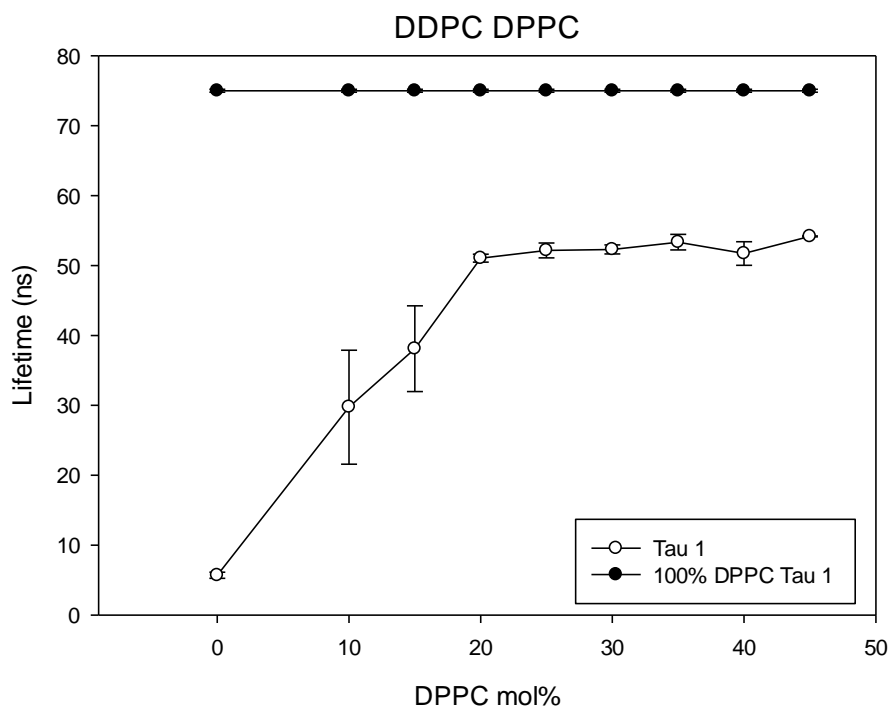

Figure S3. The longest lifetime component ( $\tau_1$ ) of tPA is given for pure SSM (filled symbols), and for SSM in unsaturated phosphatidylcholine bilayers (open symbols).

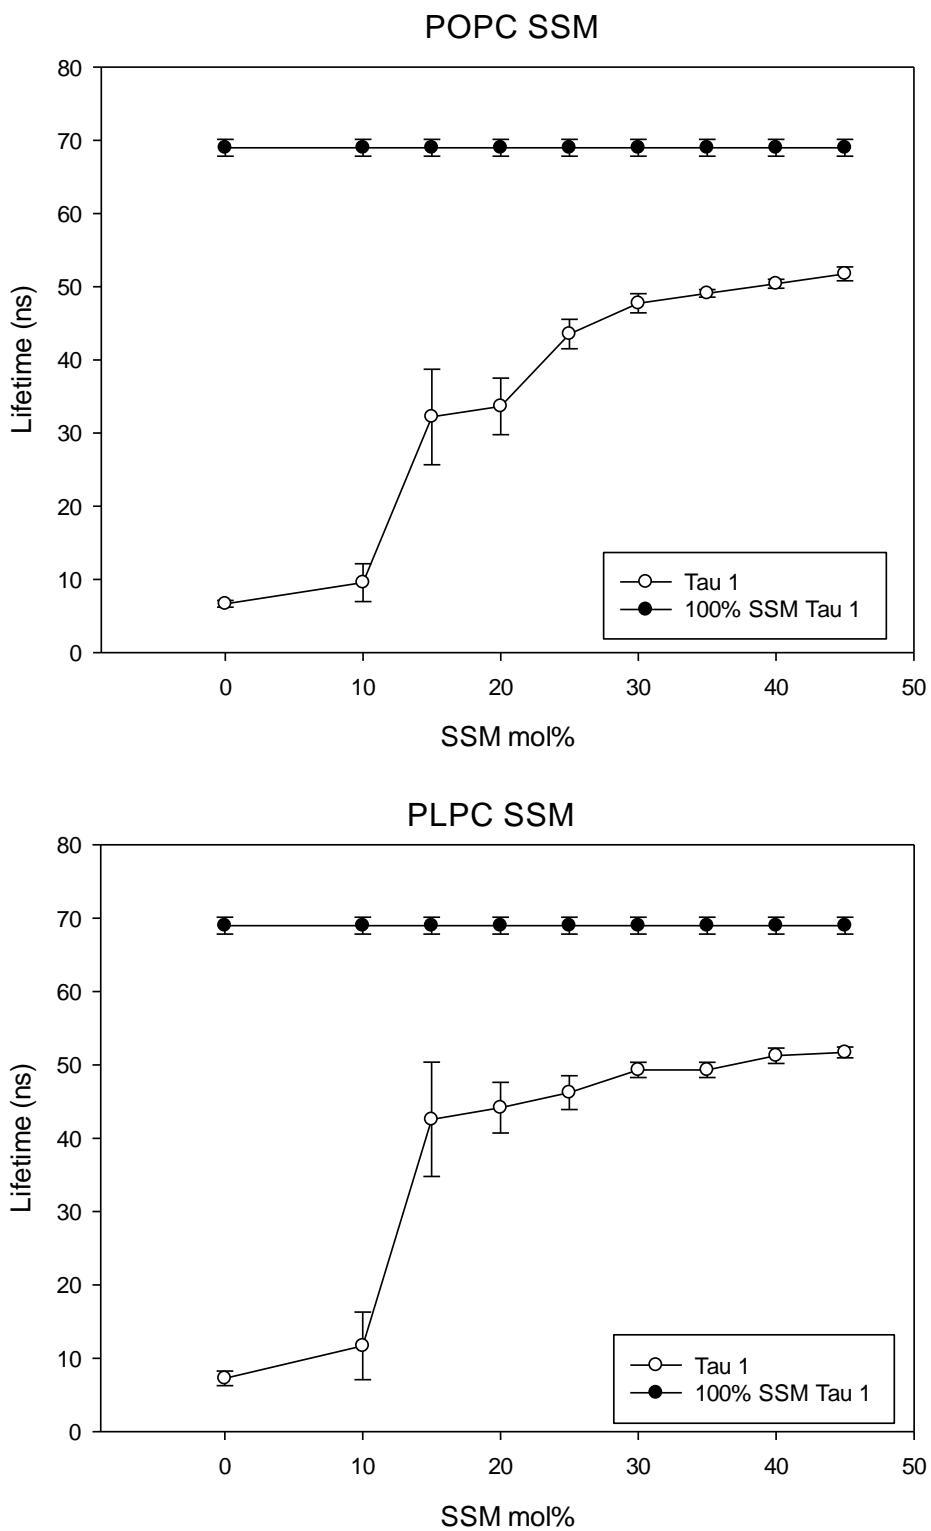

### PAPC SSM

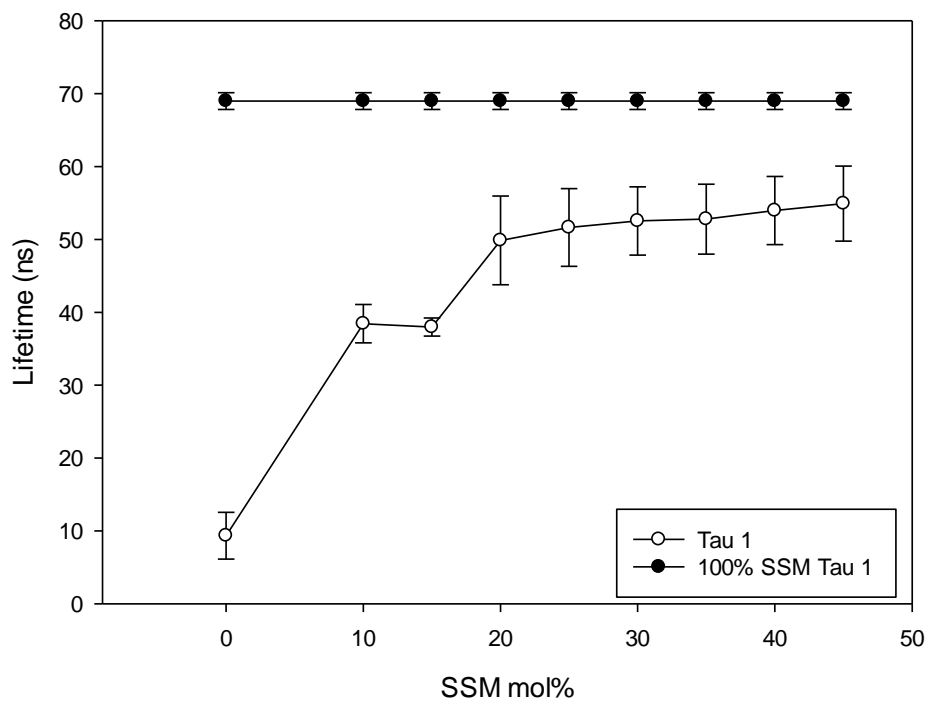

### PDPC SSM

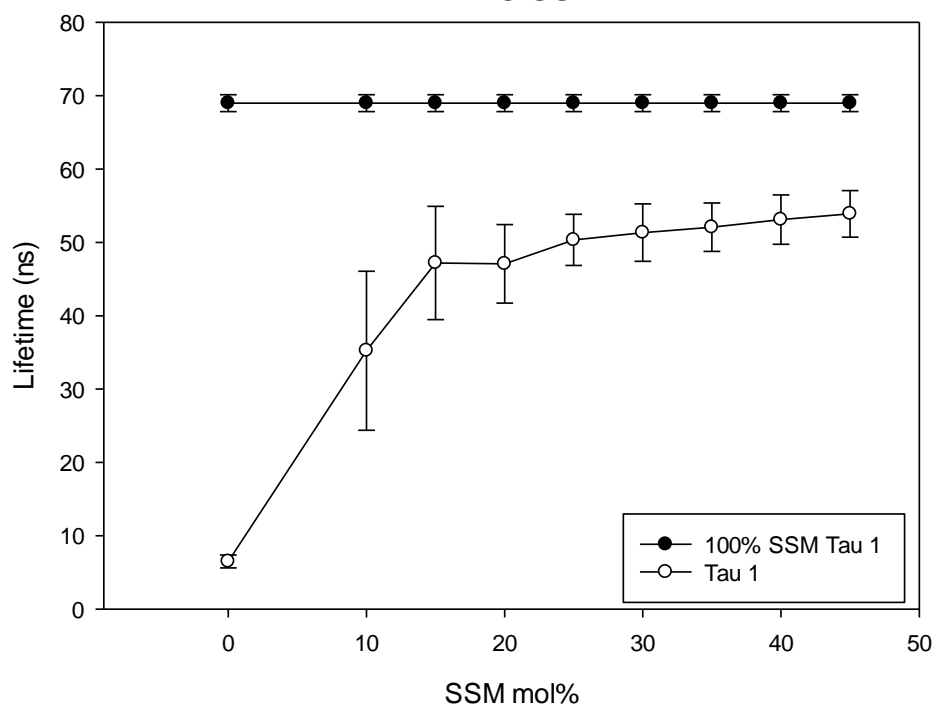

### DOPC SSM

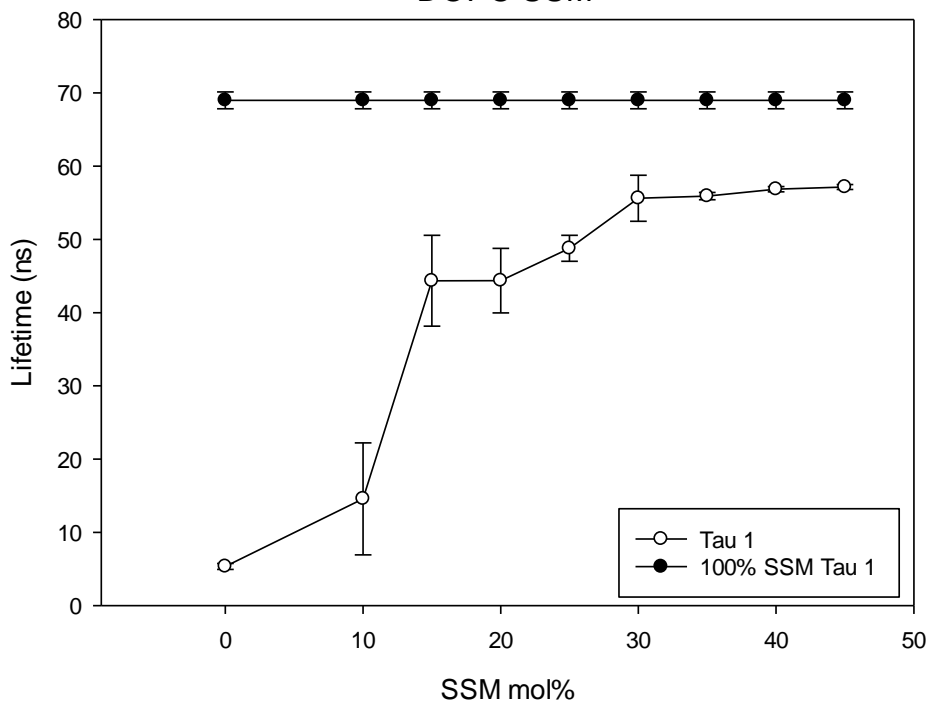

### DLPC SSM

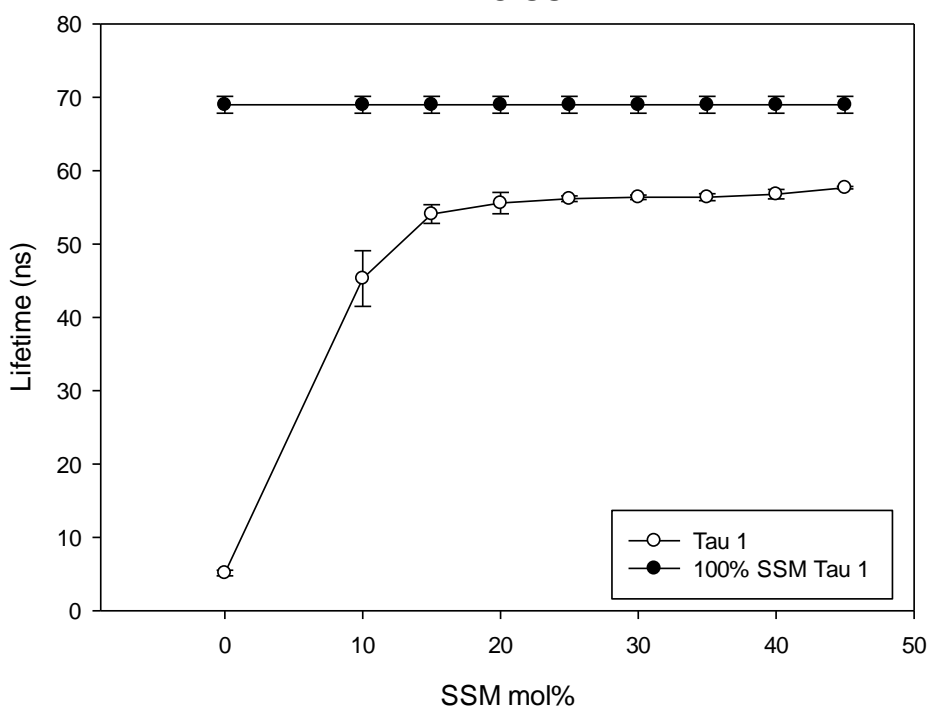

### DAPC SSM

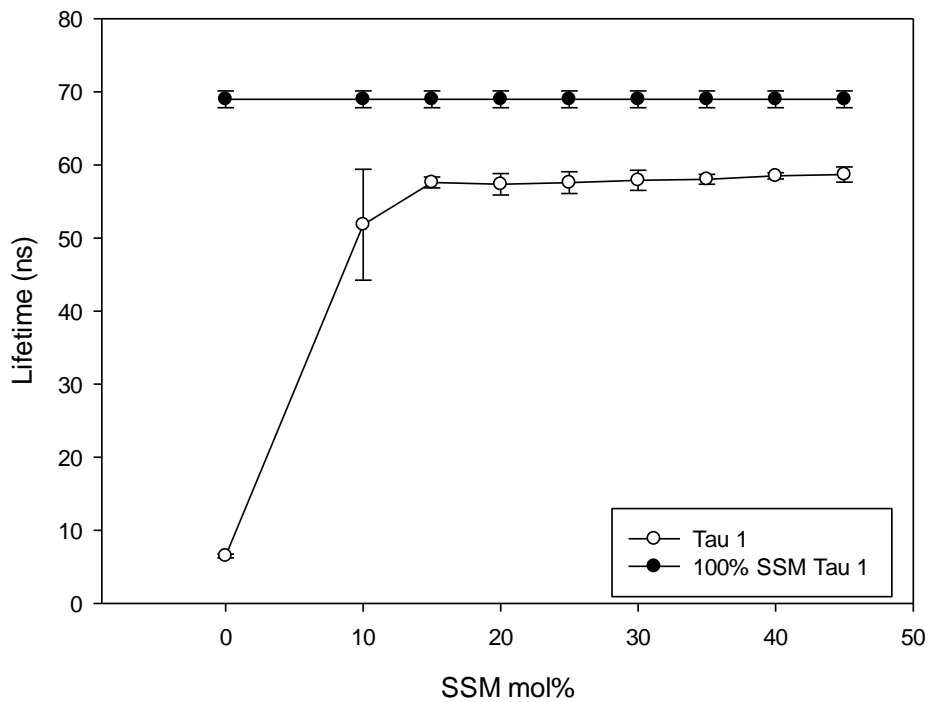

### DDPC SSM

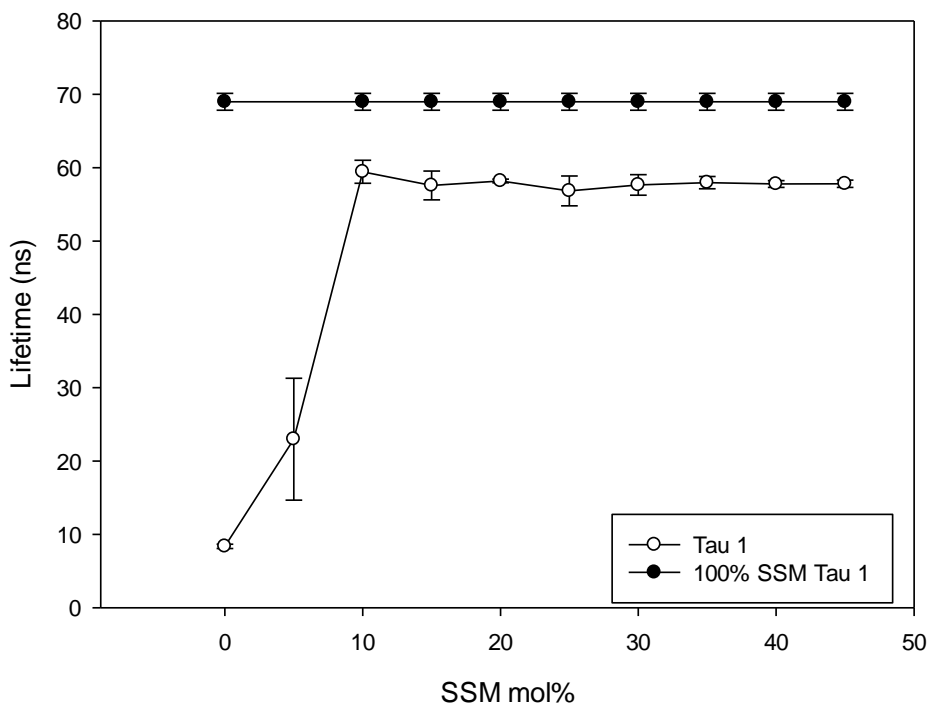

Figure S4. The longest lifetime component ( $\tau_1$ ) of tPA is given for pure PSPC (filled symbols), and for PSPC in unsaturated phosphatidylcholine bilayers (open symbols).

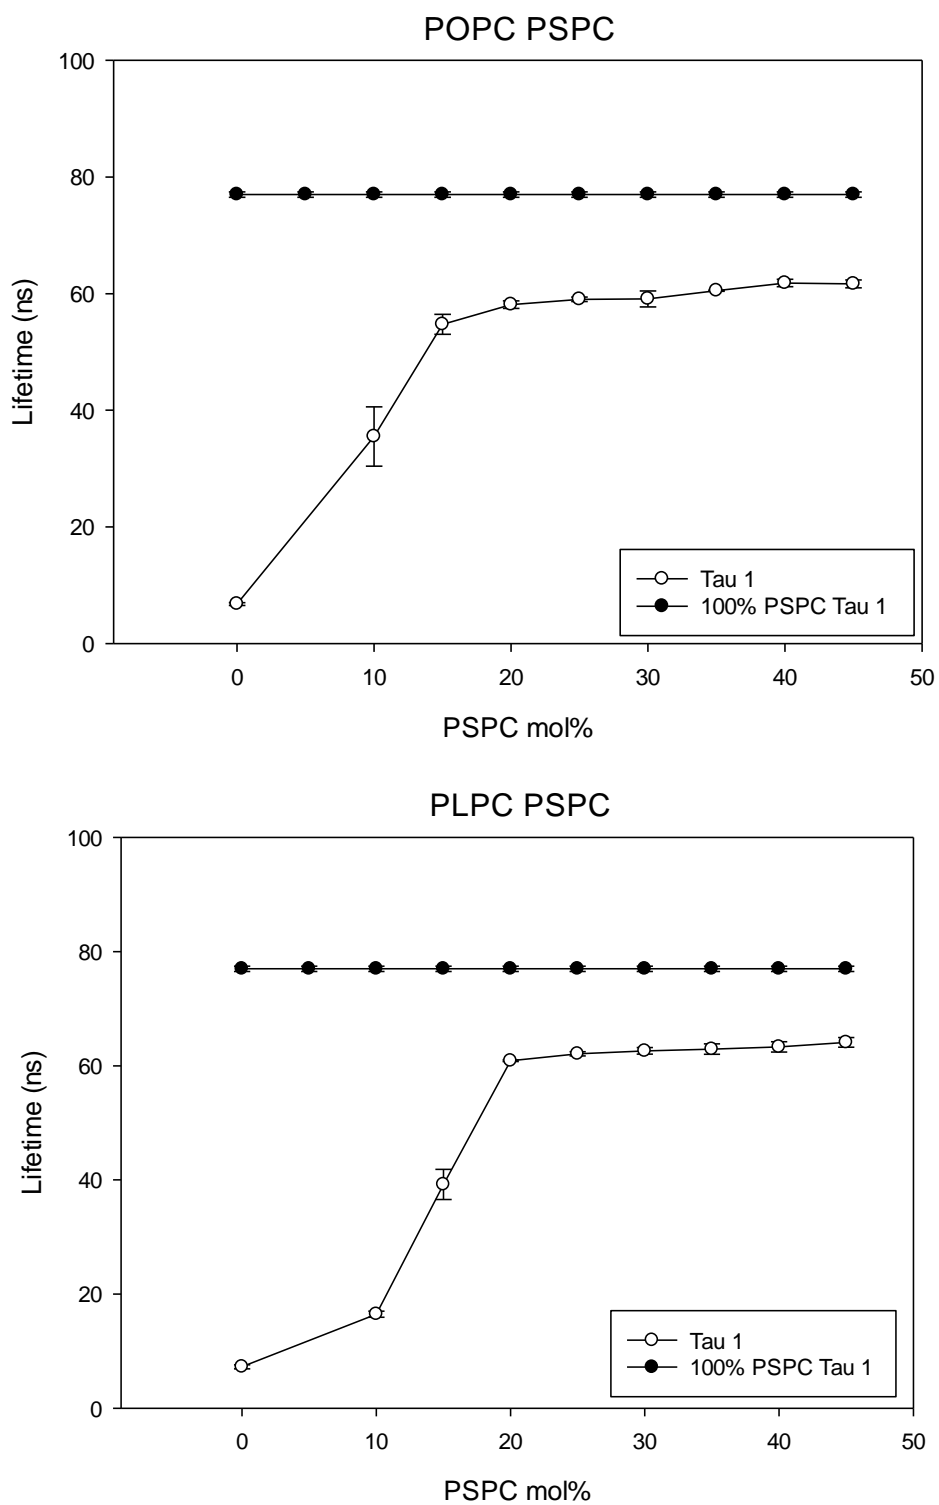



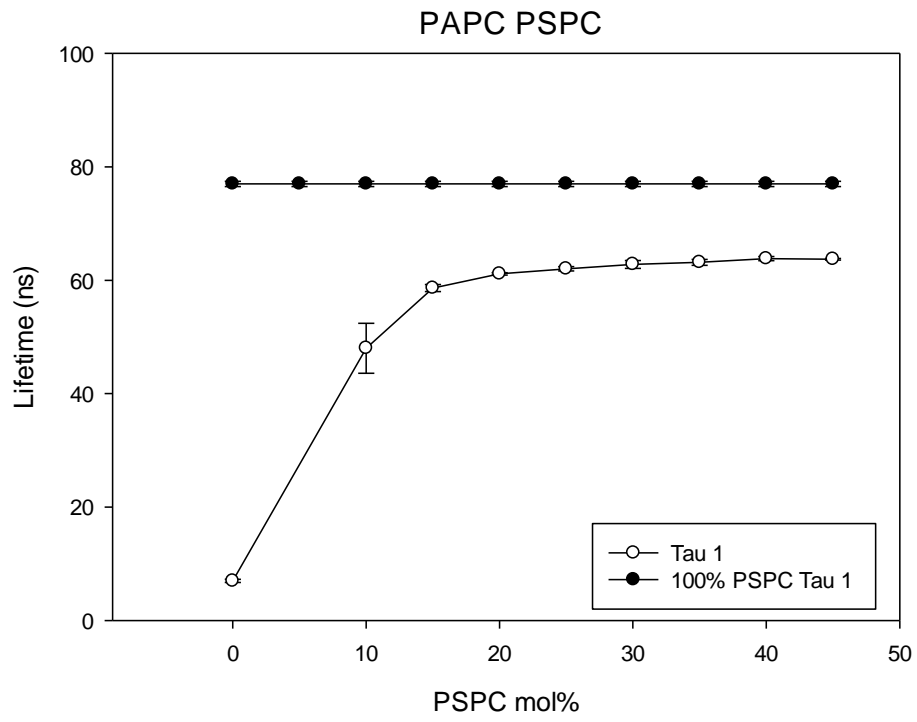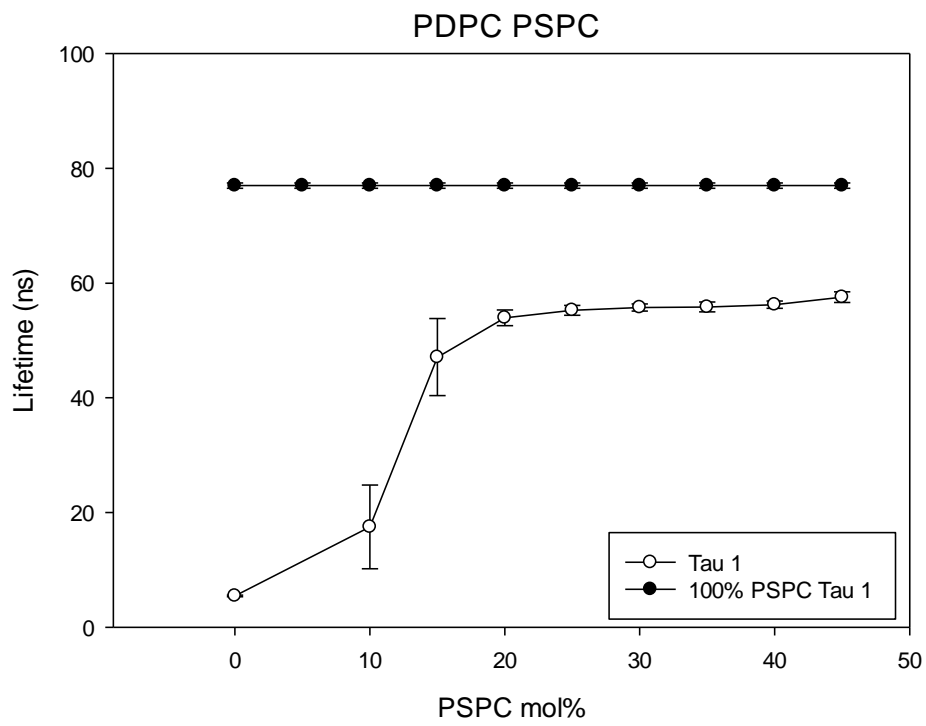

### DOPC PSC

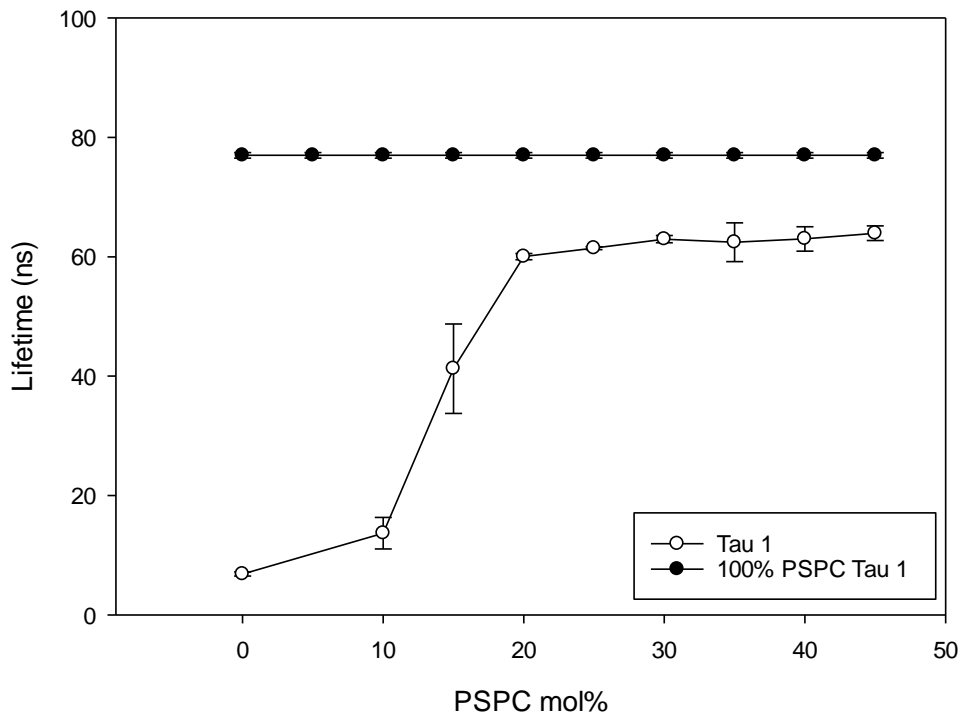

### DLPC PSC

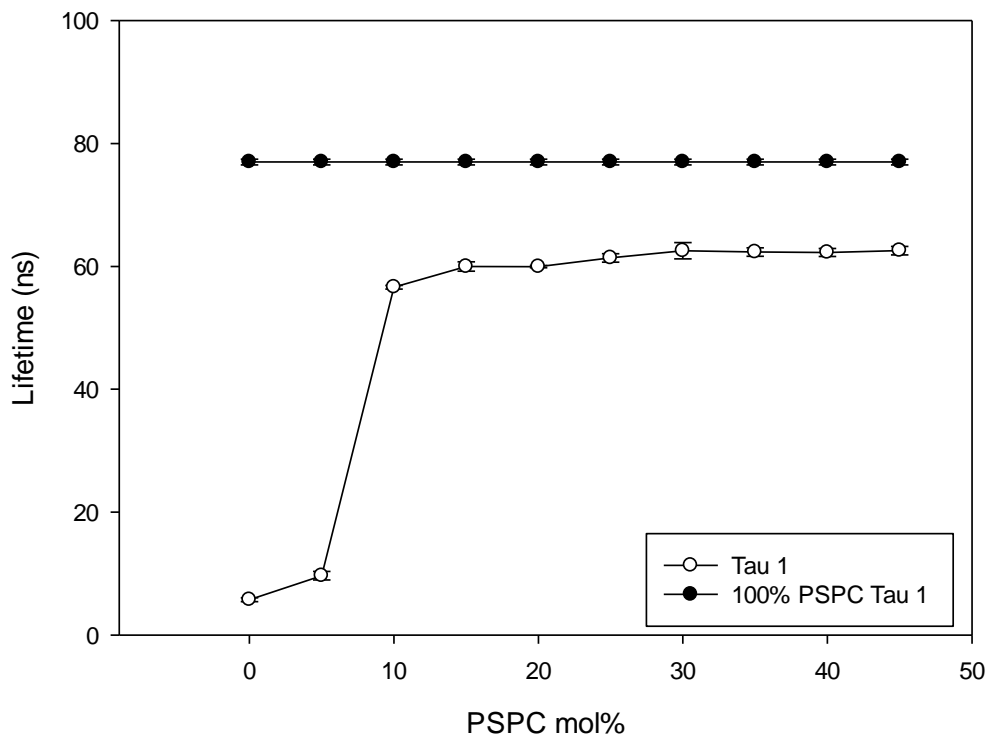

### DAPC PSC

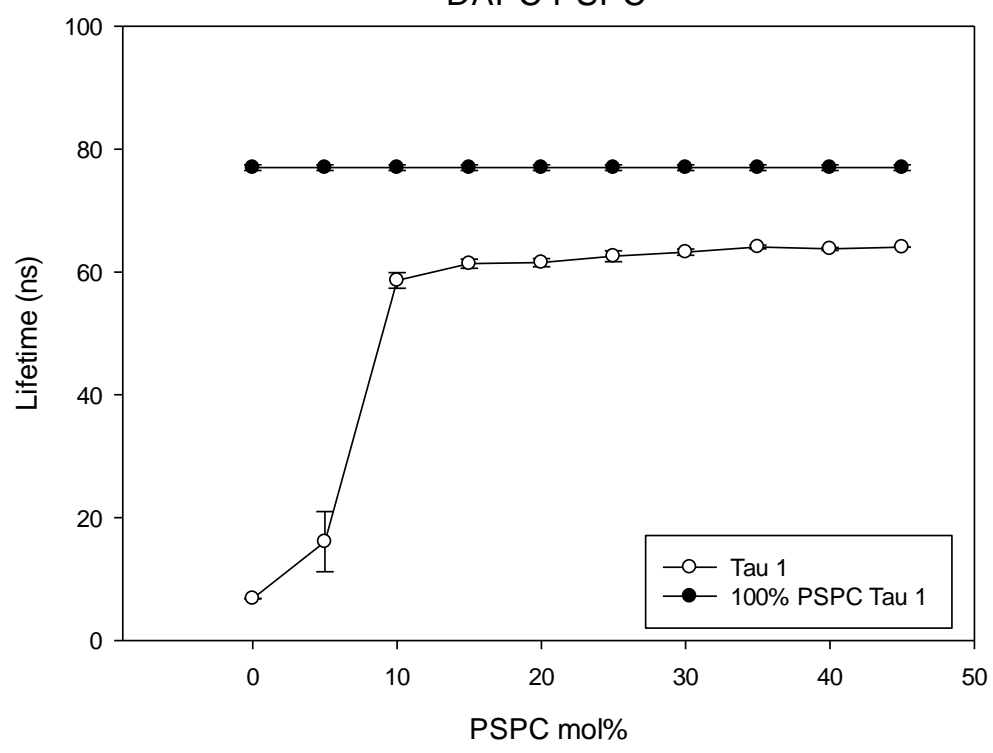

### DDPC PSC

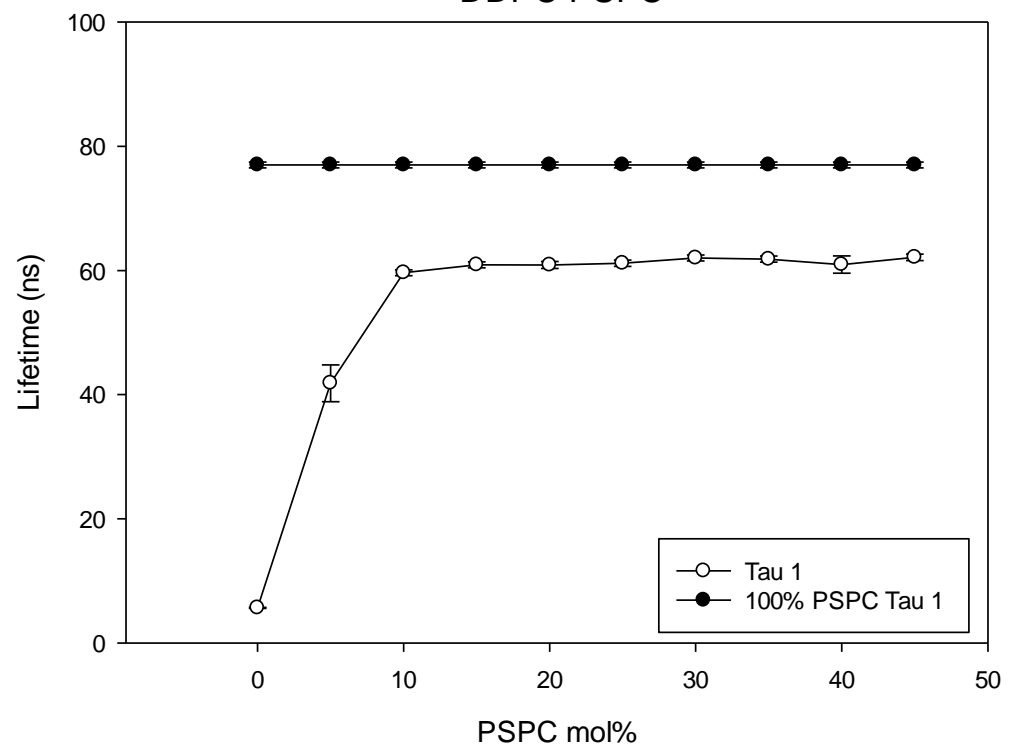

Table S1

Comparison of time-resolved fluorescence decays of tPA (1 mol%) in different bilayers at 23 °C

| Sample           | $\tau_1$   | $f_1$      | $\alpha_1$ | $\tau_2$   | $f_2$       | $\alpha_2$  | $\tau_3$  | $f_3$       | $\alpha_3$  | $\tau_{AV}$ |
|------------------|------------|------------|------------|------------|-------------|-------------|-----------|-------------|-------------|-------------|
| POPC             |            |            |            | 6.5 ± 0.2  | 50.5 ± 3.5  | 34.5 ± 3.5  | 3.4 ± 0.0 | 49.5 ± 3.5  | 65.5 ± 3.5  | 5.0 ± 0.0   |
| POPC/PSM (90:10) |            |            |            | 6.9 ± 0.2  | 45.5 ± 3.5  | 30.5 ± 2.1  | 3.7 ± 0.1 | 54.5 ± 3.5  | 69.5 ± 2.1  | 5.2 ± 0.1   |
| POPC/PSM (85:15) |            |            |            | 7.8 ± 0.3  | 44.0 ± 1.4  | 27.5 ± 2.1  | 3.7 ± 0.1 | 56.0 ± 1.4  | 72.5 ± 2.1  | 5.5 ± 0.0   |
| POPC/PSM (80:20) | 13.4 ± 0.6 | 7.5 ± 0.7  | 2.5 ± 0.7  | 5.5 ± 0.0  | 82.5 ± 0.7  | 72.0 ± 1.4  | 1.9 ± 0.2 | 10.0 ± 1.4  | 25.0 ± 1.4  | 5.8 ± 0.1   |
| POPC/PSM (75:25) | 14.9 ± 3.5 | 10.0 ± 4.2 | 4.0 ± 2.8  | 6.1 ± 0.5  | 77.0 ± 0.0  | 66.5 ± 3.5  | 2.3 ± 0.4 | 13.0 ± 4.2  | 29.5 ± 6.4  | 6.4 ± 0.2   |
| POPC/PSM (70:30) | 16.1 ± 2.2 | 11.0 ± 1.4 | 4.0 ± 1.4  | 6.0 ± 0.0  | 78.0 ± 2.8  | 69.0 ± 1.4  | 2.1 ± 0.1 | 10.5 ± 0.7  | 27.0 ± 0.0  | 6.7 ± 0.1   |
| POPC/PSM (65:35) | 20.9 ± 4.7 | 13.0 ± 0.0 | 3.5 ± 0.7  | 6.8 ± 0.0  | 71.5 ± 0.7  | 62.0 ± 0.0  | 2.6 ± 0.1 | 15.5 ± 0.7  | 34.5 ± 0.7  | 7.9 ± 0.6   |
| POPC/PSM (60:40) | 26.4 ± 4.9 | 17.5 ± 0.7 | 4.5 ± 0.7  | 8.2 ± 0.6  | 60.0 ± 7.1  | 49.0 ± 8.5  | 3.2 ± 0.3 | 22.5 ± 6.4  | 46.5 ± 9.2  | 10.2 ± 1.1  |
| POPC/PSM (55:45) | 30.2 ± 1.8 | 22.5 ± 0.7 | 6.0 ± 0.0  | 9.6 ± 0.7  | 53.5 ± 0.7  | 43.5 ± 0.7  | 3.6 ± 0.2 | 24.0 ± 0.0  | 50.5 ± 0.7  | 12.9 ± 0.7  |
| PLPC             |            |            |            | 7.4 ± 0.3  | 27.0 ± 2.8  | 15.0 ± 1.4  | 3.4 ± 0.1 | 72.5 ± 2.1  | 85.0 ± 1.4  | 4.5 ± 0.2   |
| PLPC/PSM (90:10) |            |            |            | 7.8 ± 0.2  | 26.0 ± 0.0  | 13.5 ± 0.7  | 3.5 ± 0.0 | 74.0 ± 0.0  | 86.5 ± 0.7  | 4.6 ± 0.0   |
| PLPC/PSM (85:15) |            |            |            | 7.3 ± 0.1  | 44.5 ± 4.9  | 27.0 ± 2.8  | 3.4 ± 0.2 | 55.5 ± 4.9  | 73.0 ± 2.8  | 5.2 ± 0.1   |
| PLPC/PSM (80:20) | 13.0 ± 0.8 | 7.5 ± 0.7  | 2.5 ± 0.7  | 5.0 ± 0.0  | 78.5 ± 2.1  | 67.5 ± 2.1  | 2.0 ± 0.0 | 13.5 ± 0.7  | 29.5 ± 2.1  | 5.2 ± 0.0   |
| PLPC/PSM (75:25) | 15.3 ± 0.2 | 8.5 ± 0.7  | 2.5 ± 0.7  | 5.3 ± 0.2  | 75.0 ± 0.0  | 61.0 ± 1.4  | 1.9 ± 0.4 | 16.5 ± 2.1  | 36.5 ± 0.7  | 5.6 ± 0.1   |
| PLPC/PSM (70:30) | 19.0 ± 1.0 | 8.0 ± 0.0  | 2.0 ± 0.0  | 6.1 ± 0.4  | 71.0 ± 1.4  | 57.0 ± 1.4  | 2.5 ± 0.2 | 21.0 ± 1.4  | 40.5 ± 2.1  | 6.4 ± 0.3   |
| PLPC/PSM (65:35) | 20.8 ± 3.5 | 10.5 ± 0.7 | 2.5 ± 0.7  | 6.2 ± 0.3  | 66.5 ± 4.9  | 53.5 ± 6.4  | 2.6 ± 0.1 | 23.0 ± 4.2  | 43.5 ± 6.4  | 7.0 ± 0.5   |
| PLPC/PSM (60:40) | 25.3 ± 0.6 | 17.0 ± 1.4 | 4.0 ± 0.0  | 7.6 ± 0.4  | 61.5 ± 0.7  | 50.0 ± 0.0  | 2.8 ± 0.1 | 21.0 ± 1.4  | 46.5 ± 0.7  | 9.6 ± 0.6   |
| PLPC/PSM (55:45) | 34.6 ± 0.9 | 24.0 ± 0.0 | 5.0 ± 0.0  | 10.5 ± 0.2 | 46.0 ± 1.4  | 32.0 ± 1.4  | 3.6 ± 0.1 | 30.0 ± 1.4  | 62.0 ± 1.4  | 14.3 ± 0.5  |
| PAPC             |            |            |            | 5.6 ± 1.1  | 47.0 ± 15.6 | 26.5 ± 10.6 | 2.2 ± 0.5 | 53.0 ± 15.6 | 73.5 ± 10.6 | 3.7 ± 0.3   |
| PAPC/PSM (90:10) |            |            |            | 6.4 ± 0.1  | 42.0 ± 4.2  | 19.5 ± 2.1  | 2.2 ± 0.6 | 58.0 ± 4.2  | 80.5 ± 2.1  | 3.9 ± 0.3   |
| PAPC/PSM (85:15) |            |            |            | 6.8 ± 0.4  | 37.0 ± 1.4  | 19.5 ± 0.7  | 2.8 ± 0.1 | 63.0 ± 1.4  | 80.5 ± 0.7  | 4.3 ± 0.1   |
| PAPC/PSM (80:20) | 12.8 ± 0.5 | 7.5 ± 2.1  | 2.0 ± 0.0  | 4.4 ± 0.1  | 75.5 ± 3.5  | 57.5 ± 7.8  | 1.5 ± 0.3 | 17.0 ± 1.4  | 40.5 ± 7.8  | 4.5 ± 0.0   |
| PAPC/PSM (75:25) | 13.7 ± 0.6 | 8.0 ± 1.4  | 2.0 ± 0.0  | 4.6 ± 0.0  | 77.5 ± 0.7  | 61.5 ± 2.1  | 1.6 ± 0.2 | 15.5 ± 0.7  | 37.0 ± 1.4  | 4.9 ± 0.1   |
| PAPC/PSM (70:30) | 19.3 ± 2.5 | 8.0 ± 1.4  | 1.5 ± 0.7  | 5.4 ± 0.4  | 71.0 ± 1.4  | 52.5 ± 2.1  | 1.9 ± 0.6 | 36.5 ± 24.7 | 46.5 ± 2.1  | 5.7 ± 0.3   |
| PAPC/PSM (65:35) | 23.3 ± 7.0 | 10.5 ± 2.1 | 2.5 ± 0.7  | 6.2 ± 0.7  | 65.0 ± 4.2  | 48.0 ± 4.2  | 2.3 ± 0.6 | 24.5 ± 6.4  | 49.5 ± 4.9  | 7.0 ± 0.8   |
| PAPC/PSM (60:40) | 29.0 ± 1.4 | 16.0 ± 1.4 | 3.0 ± 0.0  | 7.4 ± 0.5  | 57.5 ± 3.5  | 42.5 ± 3.5  | 2.7 ± 0.5 | 26.5 ± 4.9  | 54.5 ± 3.5  | 9.6 ± 0.1   |
| PAPC/PSM (55:45) | 36.6 ± 1.6 | 29.5 ± 0.7 | 6.0 ± 0.0  | 9.8 ± 0.1  | 44.5 ± 0.7  | 18.0 ± 21.2 | 3.2 ± 0.2 | 26.5 ± 0.7  | 61.0 ± 0.0  | 15.9 ± 0.6  |
| PDPC             |            |            |            | 6.0 ± 0.2  | 34.5 ± 0.7  | 17.5 ± 0.7  | 2.4 ± 0.2 | 65.5 ± 0.7  | 82.5 ± 0.7  | 3.6 ± 0.0   |
| PDPC/PSM (90:10) |            |            |            | 6.3 ± 0.0  | 36.5 ± 6.4  | 18.5 ± 2.1  | 2.4 ± 0.2 | 63.5 ± 6.4  | 81.5 ± 2.1  | 3.8 ± 0.1   |
| PDPC/PSM (85:15) |            |            |            | 6.7 ± 0.5  | 40.5 ± 2.1  | 20.5 ± 4.9  | 2.5 ± 0.3 | 59.5 ± 2.1  | 79.5 ± 4.9  | 4.2 ± 0.1   |
| PDPC/PSM (80:20) | 14.7 ± 5.5 | 10.0 ± 2.8 | 2.5 ± 2.1  | 4.3 ± 0.1  | 69.0 ± 5.7  | 49.0 ± 11.3 | 1.3 ± 0.1 | 21.0 ± 8.5  | 48.0 ± 12.7 | 4.6 ± 0.1   |
| PDPC/PSM (75:25) | 18.4 ± 7.8 | 9.5 ± 3.5  | 2.0 ± 1.4  | 4.7 ± 0.1  | 69.0 ± 2.8  | 51.0 ± 4.2  | 1.6 ± 0.2 | 21.5 ± 6.4  | 46.5 ± 6.4  | 5.2 ± 0.2   |
| PDPC/PSM (70:30) | 18.5 ± 4.6 | 13.0 ± 4.2 | 3.0 ± 1.4  | 5.0 ± 0.2  | 67.5 ± 0.7  | 49.5 ± 0.7  | 1.5 ± 0.3 | 19.5 ± 4.9  | 48.5 ± 2.1  | 5.9 ± 0.1   |
| PDPC/PSM (65:35) | 29.7 ± 1.1 | 18.5 ± 2.1 | 3.0 ± 0.0  | 6.9 ± 0.3  | 55.0 ± 2.8  | 38.0 ± 4.2  | 2.2 ± 0.2 | 26.5 ± 0.7  | 59.5 ± 3.5  | 9.8 ± 0.4   |
| PDPC/PSM (60:40) | 35.8 ± 1.1 | 35.5 ± 0.7 | 6.5 ± 0.7  | 8.5 ± 0.4  | 41.0 ± 1.4  | 31.0 ± 2.8  | 2.3 ± 0.1 | 23.5 ± 2.1  | 63.0 ± 2.8  | 16.8 ± 0.2  |
| PDPC/PSM (55:45) | 38.7 ± 0.9 | 49.0 ± 1.4 | 11.5 ± 0.7 | 10.9 ± 0.4 | 33.5 ± 2.1  | 28.5 ± 3.5  | 2.7 ± 0.1 | 17.5 ± 0.7  | 60.0 ± 2.8  | 23.0 ± 0.9  |

Each value is the average from at least two separate experiments ± SEM.  $\tau$ , lifetimes (ns);  $f$ , fractional intensities (%);  $\alpha$ , fractional amplitudes (%);  $\tau_{AV}$ , intensity-weighted average lifetimes (ns).

Table S2

Comparison of time-resolved fluorescence decays of tPA (1 mol%) in different bilayers at 23 °C

| Sample           | $\tau_1$   | $f_1$       | $\alpha_1$ | $\tau_2$   | $f_2$      | $\alpha_2$ | $\tau_3$  | $f_3$      | $\alpha_3$ | $\tau_{AV}$ |
|------------------|------------|-------------|------------|------------|------------|------------|-----------|------------|------------|-------------|
| DOPC             |            |             |            | 7.2 ± 1.8  | 31.5 ± 6.4 | 16.0 ± 0.0 | 2.9 ± 0.1 | 68.5 ± 6.4 | 84.0 ± 0.0 | 4.3 ± 0.8   |
| DOPC/PSM (90:10) |            |             |            | 8.0 ± 0.7  | 16.0 ± 2.8 | 7.5 ± 2.1  | 3.4 ± 0.1 | 84.0 ± 2.8 | 92.5 ± 2.1 | 4.1 ± 0.1   |
| DOPC/PSM (85:15) |            |             |            | 9.7 ± 0.9  | 15.0 ± 4.2 | 6.5 ± 2.1  | 3.6 ± 0.1 | 84.5 ± 3.5 | 93.5 ± 2.1 | 4.5 ± 0.0   |
| DOPC/PSM (80:20) | 25.3 ± 1.9 | 4.0 ± 0.0   | 1.0 ± 0.0  | 5.2 ± 0.0  | 70.0 ± 4.2 | 55.5 ± 3.5 | 2.4 ± 0.1 | 25.5 ± 3.5 | 44.0 ± 4.2 | 5.4 ± 0.0   |
| DOPC/PSM (75:25) | 16.9 ± 4.2 | 5.5 ± 0.7   | 1.5 ± 0.7  | 5.1 ± 0.5  | 77.0 ± 4.2 | 65.0 ± 7.1 | 2.1 ± 0.2 | 16.5 ± 4.9 | 33.5 ± 7.8 | 5.3 ± 0.4   |
| DOPC/PSM (70:30) | 24.7 ± 6.4 | 6.5 ± 0.7   | 1.5 ± 0.7  | 6.1 ± 0.4  | 66.0 ± 7.1 | 51.0 ± 8.5 | 2.7 ± 0.3 | 27.5 ± 7.8 | 47.5 ± 9.2 | 6.3 ± 0.3   |
| DOPC/PSM (65:35) | 22.6 ± 4.0 | 9.5 ± 0.7   | 2.0 ± 0.0  | 6.5 ± 0.8  | 64.0 ± 7.1 | 50.0 ± 8.5 | 2.8 ± 0.4 | 26.5 ± 6.4 | 48.0 ± 8.5 | 7.1 ± 0.8   |
| DOPC/PSM (60:40) | 35.8 ± 2.3 | 19.0 ± 8.5  | 3.5 ± 2.1  | 8.8 ± 0.4  | 47.5 ± 4.9 | 35.0 ± 1.4 | 3.5 ± 0.0 | 33.0 ± 2.8 | 62.0 ± 0.0 | 12.3 ± 3.0  |
| DOPC/PSM (55:45) | 41.2 ± 1.9 | 37.0 ± 9.9  | 8.5 ± 3.5  | 11.5 ± 0.9 | 36.5 ± 6.4 | 28.5 ± 2.1 | 3.8 ± 0.2 | 27.0 ± 4.2 | 63.5 ± 0.7 | 20.4 ± 4.4  |
| DLPC             |            |             |            | 7.7 ± 1.0  | 20.5 ± 0.7 | 6.5 ± 0.7  | 2.0 ± 0.0 | 79.5 ± 0.7 | 93.5 ± 0.7 | 3.2 ± 0.2   |
| DLPC/PSM (90:10) |            |             |            | 7.7 ± 0.3  | 20.0 ± 1.4 | 6.5 ± 0.7  | 2.1 ± 0.0 | 80.0 ± 1.4 | 93.5 ± 0.7 | 3.2 ± 0.1   |
| DLPC/PSM (85:15) |            |             |            | 8.2 ± 0.2  | 20.5 ± 0.7 | 7.0 ± 0.0  | 2.3 ± 0.0 | 79.5 ± 0.7 | 93.0 ± 0.0 | 3.5 ± 0.0   |
| DLPC/PSM (80:20) | 21.9 ± 5.0 | 6.5 ± 0.7   | 1.0 ± 0.0  | 4.4 ± 0.2  | 47.5 ± 6.4 | 29.5 ± 4.9 | 1.8 ± 0.1 | 46.0 ± 5.7 | 69.5 ± 4.9 | 4.3 ± 0.5   |
| DLPC/PSM (75:25) | 25.7 ± 2.4 | 9.5 ± 3.5   | 1.0 ± 0.0  | 4.5 ± 0.2  | 52.0 ± 1.4 | 33.0 ± 1.4 | 1.7 ± 0.2 | 38.0 ± 1.4 | 66.0 ± 1.4 | 5.5 ± 0.7   |
| DLPC/PSM (70:30) | 40.0 ± 0.8 | 44.5 ± 0.7  | 6.0 ± 0.0  | 7.0 ± 0.4  | 28.5 ± 3.5 | 21.5 ± 3.5 | 2.0 ± 0.1 | 27.0 ± 2.8 | 72.5 ± 3.5 | 20.4 ± 0.1  |
| DLPC/PSM (65:35) | 41.4 ± 0.8 | 53.5 ± 2.1  | 10.0 ± 0.0 | 10.8 ± 1.2 | 23.0 ± 0.0 | 17.0 ± 2.8 | 2.5 ± 0.1 | 23.5 ± 2.1 | 73.0 ± 2.8 | 25.1 ± 0.9  |
| DLPC/PSM (60:40) | 43.2 ± 1.0 | 62.0 ± 1.4  | 16.5 ± 0.7 | 13.9 ± 0.2 | 22.5 ± 0.7 | 18.5 ± 0.7 | 2.7 ± 0.0 | 15.5 ± 0.7 | 65.0 ± 0.0 | 30.4 ± 1.0  |
| DLPC/PSM (55:45) | 43.3 ± 0.8 | 64.5 ± 3.5  | 20.5 ± 2.1 | 15.0 ± 0.3 | 23.5 ± 2.1 | 21.5 ± 0.7 | 2.8 ± 0.1 | 12.0 ± 1.4 | 58.0 ± 1.4 | 31.8 ± 1.7  |
| DAPC             |            |             |            | 6.3 ± 0.1  | 23.5 ± 7.8 | 7.0 ± 0.0  | 2.0 ± 0.1 | 81.0 ± 1.4 | 93.0 ± 0.0 | 2.8 ± 0.1   |
| DAPC/PSM (90:10) |            |             |            | 8.4 ± 2.2  | 19.0 ± 2.8 | 6.5 ± 2.1  | 2.3 ± 0.0 | 81.0 ± 2.8 | 93.5 ± 2.1 | 3.4 ± 0.3   |
| DAPC/PSM (85:15) |            |             |            | 9.5 ± 2.8  | 17.5 ± 7.8 | 5.5 ± 3.5  | 2.2 ± 0.1 | 82.5 ± 7.8 | 94.5 ± 3.5 | 3.4 ± 0.0   |
| DAPC/PSM (80:20) | 38.5 ± 0.6 | 25.5 ± 13.4 | 2.0 ± 1.4  | 5.0 ± 0.1  | 34.0 ± 4.2 | 22.5 ± 2.1 | 1.8 ± 0.4 | 40.5 ± 9.2 | 75.0 ± 1.4 | 12.2 ± 4.4  |
| DAPC/PSM (75:25) | 39.1 ± 0.3 | 39.5 ± 0.7  | 4.5 ± 0.7  | 6.5 ± 0.4  | 26.0 ± 0.0 | 17.5 ± 0.7 | 2.0 ± 0.1 | 34.5 ± 0.7 | 78.0 ± 0.0 | 17.8 ± 0.0  |
| DAPC/PSM (70:30) | 42.4 ± 0.1 | 60.0 ± 1.4  | 12.5 ± 0.7 | 11.4 ± 1.4 | 20.5 ± 0.7 | 16.5 ± 0.7 | 2.4 ± 0.0 | 19.0 ± 1.4 | 71.0 ± 0.0 | 28.3 ± 0.6  |
| DAPC/PSM (65:35) | 42.5 ± 0.2 | 64.0 ± 0.0  | 17.5 ± 0.7 | 13.8 ± 0.2 | 22.0 ± 0.0 | 19.0 ± 0.0 | 2.5 ± 0.0 | 14.0 ± 0.0 | 64.0 ± 0.0 | 30.5 ± 0.0  |
| DAPC/PSM (60:40) | 43.1 ± 0.0 | 69.5 ± 2.1  | 23.5 ± 2.1 | 14.8 ± 0.1 | 22.0 ± 1.4 | 21.5 ± 0.7 | 2.3 ± 0.1 | 8.5 ± 0.7  | 54.5 ± 0.7 | 33.3 ± 0.8  |
| DAPC/PSM (55:45) | 44.1 ± 0.4 | 68.5 ± 0.7  | 28.0 ± 1.4 | 17.0 ± 0.6 | 24.0 ± 1.4 | 25.0 ± 1.4 | 2.9 ± 0.3 | 7.5 ± 0.7  | 47.5 ± 0.7 | 34.5 ± 0.7  |
| DDPC             |            |             |            | 9.1 ± 1.1  | 21.5 ± 0.7 | 5.5 ± 0.7  | 1.8 ± 0.0 | 78.5 ± 0.7 | 94.5 ± 0.7 | 3.4 ± 0.1   |
| DDPC/PSM (90:10) |            |             |            | 17.2 ± 1.3 | 21.0 ± 4.2 | 3.0 ± 0.0  | 2.1 ± 0.3 | 79.0 ± 4.2 | 97.0 ± 0.0 | 5.3 ± 0.7   |
| DDPC/PSM (85:15) |            |             |            | 32.2 ± 3.8 | 44.0 ± 7.1 | 5.5 ± 0.7  | 2.3 ± 0.1 | 56.0 ± 7.1 | 94.5 ± 0.7 | 15.5 ± 3.7  |
| DDPC/PSM (80:20) | 38.1 ± 4.0 | 53.0 ± 0.0  | 6.5 ± 0.7  | 7.0 ± 0.4  | 21.5 ± 2.1 | 14.5 ± 0.7 | 1.6 ± 0.3 | 26.0 ± 1.4 | 78.5 ± 0.7 | 22.1 ± 2.4  |
| DDPC/PSM (75:25) | 41.2 ± 0.2 | 63.5 ± 0.7  | 15.5 ± 4.9 | 12.4 ± 3.8 | 22.0 ± 4.2 | 18.0 ± 2.8 | 2.0 ± 0.0 | 14.0 ± 5.7 | 67.0 ± 7.1 | 29.4 ± 1.9  |
| DDPC/PSM (70:30) | 41.8 ± 1.1 | 68.5 ± 6.4  | 23.5 ± 0.7 | 15.0 ± 1.1 | 23.5 ± 6.4 | 22.0 ± 5.7 | 2.1 ± 0.0 | 8.0 ± 1.4  | 54.5 ± 4.9 | 32.4 ± 1.9  |
| DDPC/PSM (65:35) | 42.8 ± 1.0 | 70.5 ± 3.5  | 25.0 ± 2.8 | 15.4 ± 0.1 | 22.0 ± 2.8 | 22.0 ± 1.4 | 2.2 ± 0.1 | 7.5 ± 0.7  | 53.5 ± 0.7 | 33.6 ± 1.8  |
| DDPC/PSM (60:40) | 42.8 ± 0.9 | 69.5 ± 4.9  | 26.5 ± 3.5 | 15.8 ± 0.2 | 23.5 ± 4.9 | 24.5 ± 2.1 | 2.3 ± 0.0 | 7.5 ± 0.7  | 49.5 ± 2.1 | 33.6 ± 2.1  |
| DDPC/PSM (55:45) | 43.6 ± 0.1 | 73.0 ± 2.8  | 31.5 ± 3.5 | 16.4 ± 0.2 | 21.5 ± 2.1 | 24.5 ± 0.7 | 2.3 ± 0.1 | 5.5 ± 0.7  | 44.5 ± 3.5 | 35.4 ± 0.9  |

Each value is the average from at least two separate experiments ± SEM.  $\tau$ , lifetimes (ns);  $f$ , fractional intensities (%);  $\alpha$ , fractional amplitudes (%);  $\tau_{AV}$ , intensity-weighted average lifetimes (ns).

Table S3

Comparison of time-resolved fluorescence decays of tPA (1 mol%) in different bilayers at 23 °C

| Sample            | $\tau_1$   | $f_1$      | $\alpha_1$ | $\tau_2$   | $f_2$      | $\alpha_2$ | $\tau_3$  | $f_3$      | $\alpha_3$ | $\tau_{AV}$ |
|-------------------|------------|------------|------------|------------|------------|------------|-----------|------------|------------|-------------|
| POPC              |            |            |            | 5.7 ± 0.1  | 47.0 ± 4.2 | 33.0 ± 2.8 | 3.2 ± 0.2 | 53.0 ± 4.2 | 67.0 ± 2.8 | 4.4 ± 0.0   |
| POPC/DPPC (90:10) |            |            |            | 6.2 ± 0.0  | 48.0 ± 1.4 | 33.0 ± 1.4 | 3.4 ± 0.0 | 52.0 ± 1.4 | 67.0 ± 1.4 | 4.7 ± 0.1   |
| POPC/DPPC (85:15) |            |            |            | 6.6 ± 0.1  | 47.0 ± 1.4 | 31.5 ± 0.7 | 3.5 ± 0.0 | 53.0 ± 1.4 | 68.5 ± 0.7 | 5.0 ± 0.1   |
| POPC/DPPC (80:20) | 15.2 ± 2.4 | 4.5 ± 0.7  | 1.5 ± 0.7  | 5.3 ± 0.1  | 83.0 ± 1.4 | 69.5 ± 0.7 | 1.9 ± 0.4 | 12.5 ± 0.7 | 29.0 ± 1.4 | 5.3 ± 0.0   |
| POPC/DPPC (75:25) | 17.6 ± 0.5 | 4.0 ± 0.0  | 1.0 ± 0.0  | 5.7 ± 0.0  | 79.0 ± 0.0 | 65.5 ± 0.7 | 2.4 ± 0.0 | 17.0 ± 0.0 | 33.5 ± 0.7 | 5.7 ± 0.1   |
| POPC/DPPC (70:30) | 34.0 ± 2.4 | 10.5 ± 3.5 | 1.5 ± 0.7  | 6.8 ± 0.4  | 62.0 ± 5.7 | 49.5 ± 4.9 | 3.0 ± 0.2 | 27.5 ± 2.1 | 49.0 ± 4.2 | 8.7 ± 1.3   |
| POPC/DPPC (65:35) | 42.1 ± 0.3 | 32.5 ± 0.7 | 6.0 ± 0.0  | 9.4 ± 0.4  | 34.5 ± 0.7 | 28.0 ± 1.4 | 3.8 ± 0.1 | 32.5 ± 0.7 | 66.0 ± 1.4 | 18.2 ± 0.3  |
| POPC/DPPC (60:40) | 45.5 ± 0.3 | 49.5 ± 2.1 | 12.0 ± 1.4 | 13.3 ± 0.7 | 24.5 ± 0.7 | 20.5 ± 0.7 | 4.1 ± 0.1 | 25.5 ± 0.7 | 68.0 ± 0.0 | 27.0 ± 0.9  |
| POPC/DPPC (55:45) | 46.7 ± 0.1 | 56.0 ± 1.4 | 16.5 ± 0.7 | 16.2 ± 0.4 | 23.0 ± 0.0 | 19.0 ± 0.0 | 4.3 ± 0.0 | 20.5 ± 0.7 | 65.0 ± 1.4 | 30.9 ± 0.4  |
| PLPC              |            |            |            | 5.4 ± 0.2  | 43.5 ± 3.5 | 30.0 ± 2.8 | 3.0 ± 0.1 | 56.5 ± 3.5 | 70.0 ± 2.8 | 4.1 ± 0.1   |
| PLPC/DPPC (90:10) |            |            |            | 5.6 ± 0.0  | 47.5 ± 4.9 | 33.5 ± 4.9 | 3.1 ± 0.0 | 52.5 ± 4.9 | 66.5 ± 4.9 | 4.3 ± 0.1   |
| PLPC/DPPC (85:15) |            |            |            | 6.2 ± 0.5  | 41.5 ± 9.2 | 28.0 ± 8.5 | 3.3 ± 0.2 | 58.5 ± 9.2 | 72.0 ± 8.5 | 4.5 ± 0.0   |
| PLPC/DPPC (80:20) | 16.9 ± 4.8 | 4.0 ± 1.4  | 1.0 ± 0.0  | 4.8 ± 0.1  | 83.0 ± 2.8 | 70.5 ± 3.5 | 1.9 ± 0.3 | 14.0 ± 4.2 | 29.0 ± 4.2 | 4.8 ± 0.1   |
| PLPC/DPPC (75:25) | 27.4 ± 3.4 | 3.0 ± 0.0  | 0.0 ± 0.0  | 5.4 ± 0.1  | 73.0 ± 2.8 | 58.5 ± 2.1 | 2.6 ± 0.1 | 24.0 ± 2.8 | 41.0 ± 2.8 | 5.4 ± 0.3   |
| PLPC/DPPC (70:30) | 35.8 ± 1.5 | 9.0 ± 1.4  | 1.0 ± 0.0  | 5.9 ± 0.0  | 66.5 ± 0.7 | 54.5 ± 0.7 | 2.7 ± 0.0 | 24.5 ± 0.7 | 44.5 ± 0.7 | 7.8 ± 0.5   |
| PLPC/DPPC (65:35) | 42.7 ± 1.7 | 20.5 ± 3.5 | 2.5 ± 0.7  | 7.6 ± 0.6  | 38.5 ± 7.8 | 30.0 ± 7.1 | 3.5 ± 0.2 | 41.0 ± 4.2 | 67.5 ± 6.4 | 13.2 ± 1.7  |
| PLPC/DPPC (60:40) | 45.7 ± 0.2 | 40.5 ± 0.7 | 7.0 ± 0.0  | 9.0 ± 0.1  | 28.5 ± 0.7 | 24.5 ± 0.7 | 3.6 ± 0.0 | 31.0 ± 1.4 | 68.5 ± 0.7 | 22.2 ± 0.3  |
| PLPC/DPPC (55:45) | 46.9 ± 0.1 | 49.5 ± 0.7 | 10.5 ± 0.7 | 12.0 ± 0.3 | 22.0 ± 0.0 | 18.0 ± 0.0 | 3.9 ± 0.0 | 28.5 ± 0.7 | 72.0 ± 0.0 | 27.0 ± 0.5  |
| PAPC              |            |            |            | 6.6 ± 0.5  | 20.0 ± 1.4 | 10.0 ± 1.4 | 2.9 ± 0.0 | 80.0 ± 1.4 | 90.0 ± 1.4 | 3.7 ± 0.0   |
| PAPC/DPPC (90:10) |            |            |            | 5.7 ± 0.0  | 36.0 ± 0.0 | 22.0 ± 0.0 | 2.9 ± 0.0 | 64.0 ± 0.0 | 78.0 ± 0.0 | 3.9 ± 0.0   |
| PAPC/DPPC (85:15) |            |            |            | 6.2 ± 0.6  | 32.5 ± 6.4 | 19.5 ± 4.9 | 3.1 ± 0.2 | 67.5 ± 6.4 | 80.5 ± 4.9 | 4.1 ± 0.1   |
| PAPC/DPPC (80:20) | 17.9 ± 4.8 | 3.0 ± 0.0  | 1.0 ± 0.0  | 4.8 ± 0.1  | 70.0 ± 1.4 | 55.0 ± 0.0 | 2.3 ± 0.1 | 27.0 ± 1.4 | 44.5 ± 0.7 | 4.5 ± 0.2   |
| PAPC/DPPC (75:25) | 20.2 ± 6.3 | 3.0 ± 0.0  | 1.0 ± 0.0  | 5.1 ± 0.2  | 69.5 ± 3.5 | 53.5 ± 4.9 | 2.4 ± 0.1 | 27.5 ± 3.5 | 46.0 ± 4.2 | 4.8 ± 0.3   |
| PAPC/DPPC (70:30) | 41.7 ± 3.3 | 19.5 ± 7.8 | 2.5 ± 0.7  | 6.7 ± 0.5  | 44.0 ± 9.9 | 34.0 ± 7.1 | 2.9 ± 0.2 | 36.0 ± 2.8 | 63.5 ± 6.4 | 12.2 ± 3.5  |
| PAPC/DPPC (65:35) | 46.2 ± 0.4 | 38.0 ± 2.8 | 5.5 ± 0.7  | 8.9 ± 0.3  | 26.0 ± 0.0 | 20.5 ± 0.7 | 3.3 ± 0.0 | 35.5 ± 2.1 | 74.0 ± 1.4 | 21.1 ± 1.1  |
| PAPC/DPPC (60:40) | 47.5 ± 0.5 | 52.0 ± 1.4 | 10.0 ± 0.0 | 11.1 ± 0.9 | 20.5 ± 2.1 | 17.0 ± 2.8 | 3.4 ± 0.2 | 27.0 ± 1.4 | 73.0 ± 1.4 | 28.0 ± 0.9  |
| PAPC/DPPC (55:45) | 48.6 ± 0.1 | 59.0 ± 1.4 | 13.5 ± 0.7 | 14.2 ± 0.7 | 19.0 ± 0.0 | 15.5 ± 0.7 | 3.5 ± 0.1 | 22.0 ± 1.4 | 71.0 ± 1.4 | 32.1 ± 0.6  |
| PDPC              |            |            |            | 5.6 ± 0.2  | 30.0 ± 1.4 | 17.0 ± 0.0 | 2.7 ± 0.0 | 70.0 ± 1.4 | 83.0 ± 0.0 | 3.5 ± 0.1   |
| PDPC/DPPC (90:10) |            |            |            | 5.9 ± 0.5  | 34.0 ± 5.7 | 20.0 ± 4.2 | 2.8 ± 0.1 | 66.0 ± 5.7 | 80.0 ± 4.2 | 3.9 ± 0.0   |
| PDPC/DPPC (85:15) |            |            |            | 8.0 ± 0.1  | 20.0 ± 0.0 | 9.0 ± 0.0  | 3.2 ± 0.1 | 80.0 ± 0.0 | 91.0 ± 0.0 | 4.2 ± 0.1   |
| PDPC/DPPC (80:20) | 23.5 ± 0.8 | 3.0 ± 0.0  | 0.5 ± 0.7  | 4.8 ± 0.0  | 69.5 ± 2.1 | 52.5 ± 2.1 | 2.2 ± 0.1 | 28.0 ± 2.8 | 46.5 ± 2.1 | 4.7 ± 0.1   |
| PDPC/DPPC (75:25) | 28.6 ± 7.4 | 5.5 ± 3.5  | 0.5 ± 0.7  | 5.2 ± 0.0  | 67.5 ± 0.7 | 50.5 ± 0.7 | 2.2 ± 0.2 | 27.0 ± 2.8 | 49.0 ± 0.0 | 5.7 ± 1.2   |
| PDPC/DPPC (70:30) | 35.8 ± 7.7 | 15.0 ± 7.1 | 2.5 ± 0.7  | 6.5 ± 0.3  | 50.5 ± 6.4 | 38.0 ± 4.2 | 2.8 ± 0.0 | 34.5 ± 0.7 | 60.5 ± 3.5 | 9.9 ± 3.5   |
| PDPC/DPPC (65:35) | 41.1 ± 4.0 | 27.0 ± 7.1 | 4.0 ± 1.4  | 8.6 ± 1.0  | 35.0 ± 7.1 | 24.5 ± 4.9 | 3.2 ± 0.2 | 37.5 ± 0.7 | 71.5 ± 3.5 | 15.5 ± 3.9  |
| PDPC/DPPC (60:40) | 46.5 ± 0.3 | 47.0 ± 0.0 | 9.0 ± 0.0  | 10.8 ± 0.9 | 24.5 ± 0.7 | 19.5 ± 2.1 | 3.4 ± 0.1 | 28.0 ± 1.4 | 72.0 ± 1.4 | 25.6 ± 0.2  |
| PDPC/DPPC (55:45) | 48.2 ± 0.3 | 58.0 ± 1.4 | 13.5 ± 0.7 | 13.6 ± 0.3 | 20.5 ± 0.7 | 17.0 ± 1.4 | 3.5 ± 0.1 | 21.5 ± 0.7 | 69.5 ± 0.7 | 31.5 ± 0.5  |

Each value is the average from at least two separate experiments ± SEM.  $\tau$ , lifetimes (ns);  $f$ , fractional intensities (%);  $\alpha$ , fractional amplitudes (%);  $\tau_{AV}$ , intensity-weighted average lifetimes (ns).

Table S4

Comparison of time-resolved fluorescence decays of tPA (1 mol%) in different bilayers at 23 °C

| Sample            | $\tau_1$   | $f_1$      | $\alpha_1$ | $\tau_2$   | $f_2$      | $\alpha_2$ | $\tau_3$  | $f_3$      | $\alpha_3$ | $\tau_{AV}$ |
|-------------------|------------|------------|------------|------------|------------|------------|-----------|------------|------------|-------------|
| DOPC              |            |            |            | 5.4 ± 0.2  | 26.0 ± 5.7 | 15.0 ± 4.2 | 2.8 ± 0.1 | 74.0 ± 5.7 | 85.0 ± 4.2 | 3.4 ± 0.1   |
| DOPC/DPPC (90:10) |            |            |            | 5.8 ± 0.4  | 28.5 ± 2.1 | 17.5 ± 2.1 | 3.0 ± 0.1 | 71.5 ± 2.1 | 82.5 ± 2.1 | 3.8 ± 0.1   |
| DOPC/DPPC (85:15) |            |            |            | 7.2 ± 1.0  | 19.5 ± 6.4 | 10.0 ± 4.2 | 3.3 ± 0.2 | 80.5 ± 6.4 | 90.0 ± 4.2 | 4.0 ± 0.1   |
| DOPC/DPPC (80:20) | 30.2 ± 2.4 | 4.0 ± 0.0  | 0.0 ± 0.0  | 4.6 ± 0.2  | 69.5 ± 0.7 | 55.5 ± 0.7 | 2.3 ± 0.1 | 27.0 ± 0.0 | 43.5 ± 0.7 | 4.9 ± 0.3   |
| DOPC/DPPC (75:25) | 34.9 ± 1.8 | 6.0 ± 1.4  | 1.0 ± 0.0  | 4.8 ± 0.2  | 68.0 ± 8.5 | 55.5 ± 9.2 | 2.3 ± 0.2 | 26.0 ± 7.1 | 44.0 ± 8.5 | 6.0 ± 0.5   |
| DOPC/DPPC (70:30) | 44.2 ± 0.3 | 19.5 ± 0.7 | 2.0 ± 0.0  | 5.7 ± 0.2  | 46.0 ± 2.8 | 39.0 ± 4.2 | 2.7 ± 0.1 | 34.0 ± 2.8 | 59.0 ± 4.2 | 12.3 ± 0.3  |
| DOPC/DPPC (65:35) | 47.2 ± 0.5 | 45.0 ± 4.2 | 6.5 ± 0.7  | 7.8 ± 0.5  | 23.0 ± 1.4 | 21.5 ± 3.5 | 3.1 ± 0.2 | 32.0 ± 5.7 | 72.0 ± 4.2 | 23.9 ± 2.1  |
| DOPC/DPPC (60:40) | 49.3 ± 0.3 | 58.5 ± 3.5 | 12.5 ± 2.1 | 14.7 ± 1.3 | 15.0 ± 0.0 | 10.5 ± 0.7 | 3.6 ± 0.0 | 26.5 ± 3.5 | 77.0 ± 2.8 | 32.1 ± 2.2  |
| DOPC/DPPC (55:45) | 50.0 ± 1.3 | 61.5 ± 2.1 | 15.0 ± 1.4 | 17.0 ± 2.0 | 16.0 ± 0.0 | 11.5 ± 0.7 | 3.7 ± 0.1 | 22.5 ± 0.7 | 73.5 ± 0.7 | 34.4 ± 1.8  |
| DLPC              |            |            |            | 5.1 ± 0.3  | 30.5 ± 2.1 | 13.0 ± 1.4 | 1.8 ± 0.0 | 69.5 ± 2.1 | 87.0 ± 1.4 | 2.8 ± 0.0   |
| DLPC/DPPC (90:10) |            |            |            | 5.5 ± 0.0  | 30.0 ± 1.4 | 13.0 ± 0.0 | 2.0 ± 0.1 | 70.0 ± 1.4 | 87.0 ± 0.0 | 3.0 ± 0.0   |
| DLPC/DPPC (85:15) |            |            |            | 5.8 ± 0.6  | 30.5 ± 6.4 | 13.5 ± 3.5 | 2.1 ± 0.2 | 69.5 ± 6.4 | 86.5 ± 3.5 | 3.2 ± 0.1   |
| DLPC/DPPC (80:20) | 16.4 ± 2.2 | 4.0 ± 0.0  | 1.0 ± 0.0  | 3.7 ± 0.2  | 63.0 ± 1.4 | 42.5 ± 0.7 | 1.5 ± 0.2 | 33.5 ± 2.1 | 57.0 ± 1.4 | 3.5 ± 0.2   |
| DLPC/DPPC (75:25) | 31.6 ± 7.4 | 7.5 ± 3.5  | 0.5 ± 0.7  | 4.1 ± 0.0  | 57.0 ± 4.2 | 37.0 ± 2.8 | 1.5 ± 0.0 | 36.0 ± 0.0 | 62.5 ± 2.1 | 5.3 ± 1.6   |
| DLPC/DPPC (70:30) | 45.2 ± 0.8 | 34.5 ± 0.7 | 3.0 ± 0.0  | 5.0 ± 0.2  | 34.0 ± 1.4 | 27.0 ± 2.8 | 1.8 ± 0.0 | 31.5 ± 2.1 | 70.0 ± 2.8 | 17.8 ± 0.8  |
| DLPC/DPPC (65:35) | 46.8 ± 0.3 | 52.0 ± 1.4 | 6.0 ± 0.0  | 6.2 ± 0.2  | 22.0 ± 1.4 | 20.0 ± 0.0 | 2.0 ± 0.1 | 26.5 ± 0.7 | 74.0 ± 0.0 | 26.1 ± 0.7  |
| DLPC/DPPC (60:40) | 47.2 ± 0.9 | 59.5 ± 2.1 | 8.5 ± 0.7  | 7.6 ± 0.6  | 17.0 ± 1.4 | 16.0 ± 1.4 | 2.1 ± 0.1 | 23.0 ± 0.0 | 75.5 ± 0.7 | 29.9 ± 1.4  |
| DLPC/DPPC (55:45) | 48.0 ± 0.6 | 65.5 ± 0.7 | 12.5 ± 0.7 | 11.4 ± 1.9 | 15.5 ± 0.7 | 12.5 ± 0.7 | 2.4 ± 0.1 | 19.5 ± 0.7 | 75.0 ± 0.0 | 33.5 ± 0.3  |
| DAPC              |            |            |            | 6.7 ± 0.1  | 18.0 ± 0.0 | 6.5 ± 0.7  | 2.1 ± 0.0 | 82.0 ± 0.0 | 93.5 ± 0.7 | 3.0 ± 0.0   |
| DAPC/DPPC (90:10) |            |            |            | 13.2 ± 3.9 | 11.5 ± 2.1 | 3.0 ± 1.4  | 2.6 ± 0.0 | 88.5 ± 2.1 | 97.0 ± 1.4 | 3.8 ± 0.2   |
| DAPC/DPPC (85:15) |            |            |            | 18.7 ± 1.6 | 10.0 ± 0.0 | 2.0 ± 0.0  | 2.8 ± 0.0 | 90.0 ± 0.0 | 98.0 ± 0.0 | 4.3 ± 0.2   |
| DAPC/DPPC (80:20) | 33.4 ± 4.0 | 6.0 ± 1.4  | 1.0 ± 0.0  | 4.6 ± 0.1  | 42.0 ± 2.8 | 27.0 ± 1.4 | 2.1 ± 0.1 | 52.0 ± 1.4 | 73.0 ± 1.4 | 5.1 ± 0.6   |
| DAPC/DPPC (75:25) | 44.4 ± 2.9 | 13.5 ± 3.5 | 1.0 ± 0.0  | 5.1 ± 0.1  | 39.5 ± 0.7 | 26.5 ± 0.7 | 2.2 ± 0.0 | 47.0 ± 2.8 | 72.5 ± 0.7 | 9.1 ± 1.7   |
| DAPC/DPPC (70:30) | 53.4 ± 1.1 | 60.5 ± 0.7 | 9.0 ± 0.0  | 8.7 ± 0.9  | 13.5 ± 0.7 | 12.5 ± 2.1 | 2.6 ± 0.1 | 26.0 ± 1.4 | 79.0 ± 1.4 | 34.2 ± 1.1  |
| DAPC/DPPC (65:35) | 54.4 ± 0.6 | 76.0 ± 0.0 | 19.5 ± 0.7 | 13.8 ± 0.0 | 10.0 ± 0.0 | 10.0 ± 0.0 | 2.7 ± 0.1 | 14.0 ± 0.0 | 70.5 ± 0.7 | 43.2 ± 0.7  |
| DAPC/DPPC (60:40) | 54.8 ± 1.0 | 78.5 ± 0.7 | 22.5 ± 0.7 | 14.5 ± 1.3 | 10.0 ± 1.4 | 10.5 ± 0.7 | 2.7 ± 0.0 | 11.5 ± 0.7 | 67.0 ± 1.4 | 44.9 ± 0.8  |
| DAPC/DPPC (55:45) | 54.7 ± 0.3 | 81.0 ± 1.4 | 30.0 ± 2.8 | 17.5 ± 0.1 | 10.5 ± 0.7 | 12.0 ± 0.0 | 2.8 ± 0.0 | 8.0 ± 1.4  | 57.5 ± 2.1 | 46.6 ± 0.5  |
| DDPC              |            |            |            | 7.2 ± 1.7  | 23.5 ± 2.1 | 7.0 ± 1.4  | 1.7 ± 0.2 | 76.5 ± 2.1 | 93.0 ± 1.4 | 3.0 ± 0.5   |
| DDPC/DPPC (90:10) | 21.1 ± 4.0 | 8.5 ± 2.1  | 1.0 ± 0.0  | 3.5 ± 0.1  | 51.0 ± 2.8 | 31.5 ± 4.9 | 1.3 ± 0.0 | 40.5 ± 4.9 | 67.5 ± 4.9 | 4.0 ± 0.1   |
| DDPC/DPPC (85:15) | 31.8 ± 2.7 | 11.5 ± 0.7 | 1.0 ± 0.0  | 4.0 ± 0.2  | 46.5 ± 2.1 | 27.5 ± 0.7 | 1.4 ± 0.1 | 42.0 ± 1.4 | 71.5 ± 0.7 | 6.1 ± 0.1   |
| DDPC/DPPC (80:20) | 51.1 ± 0.6 | 63.5 ± 3.5 | 6.5 ± 0.7  | 4.9 ± 0.4  | 17.5 ± 2.1 | 18.5 ± 2.1 | 1.4 ± 0.0 | 20.0 ± 1.4 | 75.0 ± 1.4 | 33.4 ± 1.3  |
| DDPC/DPPC (75:25) | 52.2 ± 1.1 | 77.5 ± 0.7 | 14.5 ± 0.7 | 8.0 ± 0.7  | 9.5 ± 0.7  | 11.5 ± 0.7 | 1.6 ± 0.0 | 13.0 ± 0.0 | 74.5 ± 0.7 | 41.5 ± 0.5  |
| DDPC/DPPC (70:30) | 52.3 ± 0.6 | 82.0 ± 0.0 | 20.5 ± 0.7 | 10.8 ± 0.6 | 9.0 ± 0.0  | 11.0 ± 0.0 | 1.8 ± 0.0 | 9.5 ± 0.7  | 69.0 ± 0.0 | 43.8 ± 0.4  |
| DDPC/DPPC (65:35) | 53.4 ± 1.1 | 82.5 ± 2.1 | 23.5 ± 2.1 | 13.5 ± 1.0 | 9.5 ± 0.7  | 10.5 ± 0.7 | 1.9 ± 0.0 | 8.0 ± 1.4  | 66.0 ± 1.4 | 45.5 ± 1.8  |
| DDPC/DPPC (60:40) | 51.7 ± 1.7 | 84.0 ± 0.0 | 30.0 ± 0.0 | 15.1 ± 1.2 | 10.0 ± 0.0 | 12.0 ± 0.0 | 1.9 ± 0.0 | 6.0 ± 0.0  | 58.0 ± 0.0 | 45.2 ± 1.7  |
| DDPC/DPPC (55:45) | 54.2 ± 0.1 | 85.0 ± 0.0 | 32.0 ± 2.8 | 16.5 ± 1.9 | 9.5 ± 0.7  | 12.0 ± 0.0 | 1.9 ± 0.0 | 5.5 ± 0.7  | 56.0 ± 2.8 | 47.7 ± 0.5  |

Each value is the average from at least two separate experiments ± SEM.  $\tau$ , lifetimes (ns);  $f$ , fractional intensities (%);  $\alpha$ , fractional amplitudes (%);  $\tau_{AV}$ , intensity-weighted average lifetimes (ns).

Table S5

Comparison of time-resolved fluorescence decays of tPA (1 mol%) in different bilayers at 23 °C

| Sample           | $\tau_1$    | $f_1$       | $\alpha_1$ | $\tau_2$   | $f_2$      | $\alpha_2$ | $\tau_3$  | $f_3$      | $\alpha_3$  | $\tau_{AV}$ |
|------------------|-------------|-------------|------------|------------|------------|------------|-----------|------------|-------------|-------------|
| POPC             |             |             |            | 6.9 ± 0.3  | 41.0 ± 5.7 | 25.0 ± 5.7 | 3.3 ± 0.4 | 59.0 ± 5.7 | 75.0 ± 5.7  | 4.8 ± 0.6   |
| POPC/SSM (90:10) |             |             |            | 8.1 ± 0.5  | 40.5 ± 2.1 | 24.0 ± 2.8 | 3.8 ± 0.6 | 59.5 ± 2.1 | 76.0 ± 2.8  | 5.5 ± 0.6   |
| POPC/SSM (85:15) | 38.3 ± 1.5  | 7.0 ± 0.0   | 1.0 ± 0.0  | 6.7 ± 0.7  | 70.5 ± 0.7 | 55.0 ± 2.8 | 2.7 ± 0.4 | 22.5 ± 0.7 | 44.0 ± 2.8  | 8.0 ± 0.8   |
| POPC/SSM (80:20) | 32.1 ± 3.8  | 8.5 ± 0.7   | 1.5 ± 0.7  | 7.3 ± 0.6  | 68.5 ± 3.5 | 53.5 ± 4.9 | 2.9 ± 0.3 | 23.0 ± 2.8 | 44.5 ± 4.9  | 8.5 ± 0.2   |
| POPC/SSM (75:25) | 42.7 ± 1.9  | 22.5 ± 2.1  | 4.0 ± 1.4  | 9.6 ± 0.4  | 49.5 ± 3.5 | 39.0 ± 5.7 | 3.6 ± 0.2 | 28.0 ± 5.7 | 57.5 ± 6.4  | 15.3 ± 0.7  |
| POPC/SSM (70:30) | 48.5 ± 0.6  | 52.5 ± 2.1  | 15.5 ± 0.7 | 15.0 ± 0.4 | 28.5 ± 0.7 | 26.5 ± 0.7 | 4.6 ± 0.2 | 19.0 ± 1.4 | 58.0 ± 1.4  | 30.6 ± 1.1  |
| POPC/SSM (65:35) | 49.4 ± 0.3  | 64.0 ± 0.0  | 24.0 ± 1.4 | 17.0 ± 0.6 | 24.0 ± 0.0 | 26.0 ± 1.4 | 4.4 ± 0.5 | 12.0 ± 0.0 | 50.5 ± 2.1  | 36.2 ± 0.3  |
| POPC/SSM (60:40) | 50.6 ± 0.7  | 72.5 ± 0.7  | 35.5 ± 0.7 | 19.4 ± 1.6 | 20.5 ± 0.7 | 26.0 ± 0.0 | 4.4 ± 0.6 | 6.5 ± 0.7  | 38.5 ± 0.7  | 41.0 ± 0.4  |
| POPC/SSM (55:45) | 52.1 ± 1.1  | 73.0 ± 0.0  | 41.0 ± 0.0 | 22.8 ± 1.3 | 21.0 ± 0.0 | 26.5 ± 0.7 | 5.2 ± 0.1 | 6.0 ± 0.0  | 32.5 ± 0.7  | 43.2 ± 1.0  |
| PLPC             |             |             |            | 7.6 ± 1.2  | 27.0 ± 8.5 | 15.0 ± 7.1 | 3.5 ± 0.2 | 73.0 ± 8.5 | 85.0 ± 7.1  | 4.5 ± 0.1   |
| PLPC/SSM (90:10) |             |             |            | 9.1 ± 1.1  | 31.0 ± 1.4 | 16.5 ± 0.7 | 4.1 ± 0.5 | 69.0 ± 1.4 | 83.5 ± 0.7  | 5.6 ± 0.7   |
| PLPC/SSM (85:15) | 42.6 ± 6.4  | 9.0 ± 2.8   | 1.0 ± 0.0  | 6.5 ± 0.1  | 62.5 ± 0.7 | 48.0 ± 0.0 | 2.8 ± 0.1 | 28.5 ± 2.1 | 51.0 ± 0.0  | 8.9 ± 1.7   |
| PLPC/SSM (80:20) | 46.1 ± 0.9  | 14.5 ± 0.7  | 2.0 ± 0.0  | 7.7 ± 0.1  | 53.5 ± 0.7 | 40.5 ± 0.7 | 3.2 ± 0.0 | 31.5 ± 0.7 | 57.5 ± 0.7  | 12.0 ± 0.5  |
| PLPC/SSM (75:25) | 46.2 ± 2.3  | 35.0 ± 10.1 | 6.7 ± 2.5  | 9.9 ± 0.6  | 40.7 ± 6.8 | 34.7 ± 3.2 | 3.6 ± 0.3 | 24.3 ± 3.5 | 58.7 ± 2.3  | 21.2 ± 4.8  |
| PLPC/SSM (70:30) | 48.4 ± 0.5  | 54.0 ± 2.8  | 15.0 ± 0.0 | 13.6 ± 1.3 | 28.5 ± 2.1 | 27.5 ± 0.7 | 4.1 ± 0.5 | 17.5 ± 0.7 | 57.5 ± 0.7  | 30.8 ± 1.0  |
| PLPC/SSM (65:35) | 48.7 ± 0.2  | 65.5 ± 2.1  | 24.5 ± 0.7 | 15.7 ± 0.4 | 23.5 ± 2.1 | 27.0 ± 1.4 | 4.0 ± 0.4 | 10.5 ± 0.7 | 48.5 ± 0.7  | 36.1 ± 0.9  |
| PLPC/SSM (60:40) | 50.8 ± 0.9  | 73.0 ± 0.0  | 35.0 ± 1.4 | 18.8 ± 0.9 | 20.5 ± 0.7 | 26.0 ± 0.0 | 4.2 ± 0.5 | 7.0 ± 0.0  | 39.0 ± 1.4  | 41.2 ± 1.0  |
| PLPC/SSM (55:45) | 52.0 ± 0.7  | 76.5 ± 0.7  | 42.0 ± 1.4 | 21.0 ± 1.1 | 18.5 ± 0.7 | 25.5 ± 0.7 | 4.3 ± 0.4 | 5.0 ± 0.0  | 32.5 ± 0.7  | 43.9 ± 0.9  |
| PAPC             |             |             |            | 7.6 ± 1.9  | 20.5 ± 7.8 | 10.5 ± 6.4 | 3.2 ± 0.1 | 79.5 ± 7.8 | 89.5 ± 6.4  | 4.0 ± 0.1   |
| PAPC/SSM (90:10) | 28.1 ± 2.6  | 4.0 ± 0.0   | 1.0 ± 0.0  | 4.9 ± 0.0  | 68.0 ± 1.4 | 52.0 ± 0.0 | 2.2 ± 0.2 | 28.0 ± 1.4 | 47.5 ± 0.7  | 5.2 ± 0.2   |
| PAPC/SSM (85:15) | 38.0 ± 1.2  | 7.5 ± 0.7   | 1.0 ± 0.0  | 5.6 ± 0.2  | 63.5 ± 3.5 | 48.0 ± 4.2 | 2.4 ± 0.1 | 29.5 ± 3.5 | 51.0 ± 4.2  | 7.0 ± 0.5   |
| PAPC/SSM (80:20) | 46.5 ± 2.7  | 16.5 ± 2.1  | 2.0 ± 0.0  | 6.8 ± 0.3  | 48.0 ± 4.2 | 36.0 ± 2.8 | 2.9 ± 0.2 | 35.5 ± 2.1 | 62.5 ± 2.1  | 12.0 ± 1.6  |
| PAPC/SSM (75:25) | 48.7 ± 2.0  | 45.0 ± 7.1  | 7.5 ± 2.1  | 9.4 ± 1.1  | 28.5 ± 6.4 | 25.0 ± 4.2 | 3.3 ± 0.3 | 27.0 ± 1.4 | 67.5 ± 2.1  | 25.4 ± 4.1  |
| PAPC/SSM (70:30) | 49.9 ± 0.8  | 63.5 ± 0.7  | 17.0 ± 0.0 | 13.2 ± 1.3 | 20.0 ± 0.0 | 21.0 ± 1.4 | 3.5 ± 0.3 | 16.5 ± 0.7 | 62.5 ± 0.7  | 35.0 ± 0.6  |
| PAPC/SSM (65:35) | 52.8 ± 4.8  | 73.3 ± 3.5  | 30.3 ± 9.3 | 17.4 ± 4.1 | 18.7 ± 0.6 | 23.3 ± 3.2 | 3.6 ± 0.7 | 8.0 ± 3.6  | 46.3 ± 12.4 | 38.9 ± 0.4  |
| PAPC/SSM (60:40) | 51.3 ± 0.6  | 76.0 ± 1.4  | 35.0 ± 0.0 | 18.9 ± 0.8 | 18.0 ± 1.4 | 22.5 ± 0.7 | 3.7 ± 0.2 | 6.5 ± 0.7  | 42.5 ± 0.7  | 42.4 ± 0.8  |
| PAPC/SSM (55:45) | 52.0 ± 0.6  | 79.0 ± 2.8  | 41.5 ± 0.7 | 18.9 ± 2.1 | 16.5 ± 2.1 | 23.0 ± 1.4 | 3.4 ± 0.7 | 4.5 ± 0.7  | 35.5 ± 2.1  | 44.5 ± 1.1  |
| PDPC             |             |             |            | 6.0 ± 0.2  | 32.0 ± 2.8 | 16.5 ± 0.7 | 2.6 ± 0.1 | 68.0 ± 2.8 | 83.5 ± 0.7  | 3.7 ± 0.1   |
| PDPC/SSM (90:10) | 30.6 ± 10.3 | 5.5 ± 2.1   | 1.0 ± 0.0  | 4.8 ± 0.1  | 64.0 ± 2.8 | 46.0 ± 2.8 | 2.0 ± 0.0 | 30.5 ± 0.7 | 53.0 ± 2.8  | 5.6 ± 1.1   |
| PDPC/SSM (85:15) | 51.1 ± 5.1  | 15.5 ± 3.5  | 1.5 ± 0.7  | 6.5 ± 0.8  | 47.0 ± 2.8 | 33.0 ± 4.2 | 2.6 ± 0.5 | 37.5 ± 6.4 | 65.0 ± 4.2  | 11.9 ± 0.6  |
| PDPC/SSM (80:20) | 44.1 ± 2.2  | 21.5 ± 0.7  | 2.5 ± 0.7  | 7.0 ± 0.1  | 45.0 ± 1.4 | 32.5 ± 0.7 | 2.6 ± 0.2 | 33.5 ± 2.1 | 65.0 ± 1.4  | 13.4 ± 0.0  |
| PDPC/SSM (75:25) | 48.4 ± 0.5  | 60.5 ± 4.9  | 13.5 ± 2.1 | 10.9 ± 0.2 | 22.0 ± 1.4 | 21.0 ± 0.0 | 2.8 ± 0.2 | 18.0 ± 2.8 | 65.5 ± 2.1  | 32.2 ± 2.3  |
| PDPC/SSM (70:30) | 49.1 ± 0.7  | 70.5 ± 3.5  | 22.5 ± 2.1 | 14.2 ± 0.4 | 19.0 ± 1.4 | 21.0 ± 0.0 | 2.9 ± 0.3 | 10.5 ± 2.1 | 56.5 ± 2.1  | 37.6 ± 1.9  |
| PDPC/SSM (65:35) | 50.2 ± 0.4  | 75.0 ± 0.0  | 32.0 ± 1.4 | 17.5 ± 0.7 | 18.0 ± 0.0 | 21.5 ± 0.7 | 3.2 ± 0.1 | 7.0 ± 0.0  | 46.5 ± 2.1  | 41.0 ± 0.1  |
| PDPC/SSM (60:40) | 51.2 ± 0.7  | 78.0 ± 1.4  | 38.0 ± 0.0 | 18.2 ± 1.5 | 17.0 ± 1.4 | 23.5 ± 0.7 | 3.1 ± 0.2 | 5.0 ± 0.0  | 38.5 ± 0.7  | 43.3 ± 0.9  |
| PDPC/SSM (55:45) | 52.1 ± 0.7  | 79.5 ± 0.7  | 43.5 ± 0.7 | 20.3 ± 0.5 | 17.0 ± 0.0 | 24.0 ± 0.0 | 3.3 ± 0.2 | 4.0 ± 0.0  | 33.0 ± 1.4  | 44.8 ± 0.4  |

Each value is the average from at least two separate experiments ± SEM.  $\tau$ , lifetimes (ns);  $f$ , fractional intensities (%);  $\alpha$ , fractional amplitudes (%);  $\tau_{AV}$ , intensity-weighted average lifetimes (ns).



Table S6

Comparison of time-resolved fluorescence decays of tPA (1 mol%) in different bilayers at 23 °C

| Sample           | $\tau_1$   | $f_1$      | $\alpha_1$ | $\tau_2$   | $f_2$       | $\alpha_2$  | $\tau_3$  | $f_3$       | $\alpha_3$  | $\tau_{AV}$ |
|------------------|------------|------------|------------|------------|-------------|-------------|-----------|-------------|-------------|-------------|
| DOPC             |            |            |            | 5.6 ± 0.1  | 21.0 ± 1.4  | 12.0 ± 1.4  | 2.8 ± 0.0 | 79.0 ± 1.4  | 88.0 ± 1.4  | 3.4 ± 0.0   |
| DOPC/SSM (90:10) | 17.6 ± 7.9 | 3.5 ± 0.7  | 0.5 ± 0.7  | 4.6 ± 0.5  | 69.5 ± 10.6 | 55.5 ± 12.0 | 2.2 ± 0.4 | 27.0 ± 11.3 | 44.0 ± 12.7 | 4.4 ± 0.3   |
| DOPC/SSM (85:15) | 39.6 ± 1.5 | 5.0 ± 0.0  | 1.0 ± 0.0  | 5.7 ± 0.1  | 57.0 ± 0.0  | 40.5 ± 0.7  | 2.7 ± 0.0 | 38.5 ± 0.7  | 59.0 ± 0.0  | 6.2 ± 0.2   |
| DOPC/SSM (80:20) | 46.9 ± 0.2 | 8.5 ± 0.7  | 1.0 ± 0.0  | 6.9 ± 0.2  | 52.0 ± 0.0  | 35.0 ± 0.0  | 2.9 ± 0.1 | 40.0 ± 0.0  | 64.0 ± 0.0  | 8.7 ± 0.1   |
| DOPC/SSM (75:25) | 49.7 ± 1.0 | 16.0 ± 1.4 | 2.0 ± 0.0  | 8.7 ± 0.2  | 45.0 ± 1.4  | 30.5 ± 0.7  | 3.4 ± 0.1 | 39.0 ± 1.4  | 67.5 ± 0.7  | 13.2 ± 1.1  |
| DOPC/SSM (70:30) | 53.8 ± 0.3 | 44.5 ± 0.7 | 8.0 ± 0.0  | 11.8 ± 0.2 | 28.0 ± 0.0  | 22.5 ± 0.7  | 3.7 ± 0.0 | 27.5 ± 0.7  | 69.5 ± 0.7  | 28.3 ± 0.2  |
| DOPC/SSM (65:35) | 55.7 ± 0.4 | 63.0 ± 0.0 | 17.5 ± 0.7 | 15.2 ± 0.6 | 21.5 ± 0.7  | 21.5 ± 0.7  | 3.9 ± 0.1 | 15.5 ± 0.7  | 60.5 ± 0.7  | 39.1 ± 0.4  |
| DOPC/SSM (60:40) | 56.7 ± 0.1 | 70.5 ± 0.7 | 25.5 ± 0.7 | 17.9 ± 0.1 | 19.5 ± 0.7  | 23.0 ± 0.0  | 4.0 ± 0.1 | 10.0 ± 0.0  | 52.0 ± 1.4  | 43.7 ± 0.3  |
| DOPC/SSM (55:45) | 57.3 ± 0.2 | 75.0 ± 0.0 | 33.0 ± 0.0 | 19.4 ± 0.6 | 18.0 ± 0.0  | 24.0 ± 0.0  | 4.1 ± 0.1 | 7.0 ± 0.0   | 43.0 ± 0.0  | 46.7 ± 0.1  |
| DLPC             |            |            |            | 4.9 ± 0.0  | 29.0 ± 0.0  | 12.5 ± 0.7  | 1.7 ± 0.0 | 71.0 ± 0.0  | 87.5 ± 0.7  | 2.7 ± 0.0   |
| DLPC/SSM (90:10) | 47.3 ± 2.3 | 9.5 ± 0.7  | 1.0 ± 0.0  | 4.2 ± 0.2  | 47.0 ± 2.8  | 29.0 ± 2.8  | 1.6 ± 0.0 | 43.5 ± 2.1  | 70.5 ± 3.5  | 7.1 ± 0.6   |
| DLPC/SSM (85:15) | 52.9 ± 0.2 | 20.5 ± 0.7 | 1.0 ± 0.0  | 4.6 ± 0.4  | 44.0 ± 2.8  | 30.0 ± 2.8  | 1.6 ± 0.2 | 35.0 ± 2.8  | 68.5 ± 2.1  | 13.6 ± 0.4  |
| DLPC/SSM (80:20) | 56.2 ± 1.3 | 49.5 ± 3.5 | 5.0 ± 0.0  | 6.3 ± 0.6  | 24.5 ± 0.7  | 21.5 ± 2.1  | 1.9 ± 0.2 | 26.0 ± 2.8  | 73.5 ± 2.1  | 30.1 ± 2.4  |
| DLPC/SSM (75:25) | 56.4 ± 0.2 | 65.0 ± 1.4 | 11.0 ± 1.4 | 10.3 ± 0.7 | 16.5 ± 0.7  | 15.0 ± 0.0  | 2.3 ± 0.1 | 18.5 ± 0.7  | 74.5 ± 0.7  | 38.8 ± 1.1  |
| DLPC/SSM (70:30) | 56.2 ± 0.0 | 72.0 ± 0.0 | 16.0 ± 0.0 | 12.5 ± 0.4 | 15.5 ± 0.7  | 16.0 ± 0.0  | 2.3 ± 0.0 | 12.5 ± 0.7  | 68.0 ± 0.0  | 42.7 ± 0.2  |
| DLPC/SSM (65:35) | 56.2 ± 0.4 | 74.5 ± 0.7 | 20.0 ± 1.4 | 13.7 ± 0.6 | 15.5 ± 0.7  | 17.0 ± 0.0  | 2.3 ± 0.1 | 10.0 ± 0.0  | 63.0 ± 1.4  | 44.2 ± 0.2  |
| DLPC/SSM (60:40) | 56.5 ± 0.4 | 77.5 ± 0.7 | 25.0 ± 1.4 | 14.9 ± 0.2 | 15.0 ± 0.0  | 18.5 ± 0.7  | 2.3 ± 0.0 | 7.5 ± 0.7   | 56.5 ± 2.1  | 46.2 ± 0.2  |
| DLPC/SSM (55:45) | 57.8 ± 0.2 | 79.5 ± 0.7 | 29.0 ± 1.4 | 16.2 ± 1.0 | 15.0 ± 1.4  | 19.5 ± 0.7  | 2.4 ± 0.1 | 6.0 ± 0.0   | 51.5 ± 2.1  | 48.3 ± 0.3  |
| DAPC             |            |            |            | 6.5 ± 0.3  | 18.0 ± 5.7  | 6.5 ± 2.1   | 2.0 ± 0.0 | 82.0 ± 5.7  | 93.5 ± 2.1  | 2.8 ± 0.3   |
| DAPC/SSM (90:10) | 46.4 ± 0.1 | 9.0 ± 0.0  | 1.0 ± 0.0  | 4.4 ± 0.3  | 41.5 ± 4.9  | 26.0 ± 4.2  | 1.8 ± 0.1 | 49.0 ± 5.7  | 73.0 ± 4.2  | 7.1 ± 0.0   |
| DAPC/SSM (85:15) | 57.6 ± 0.7 | 52.0 ± 5.7 | 5.5 ± 2.1  | 7.3 ± 1.8  | 19.0 ± 5.7  | 16.0 ± 5.7  | 2.2 ± 0.2 | 29.5 ± 0.7  | 78.5 ± 4.9  | 31.8 ± 2.9  |
| DAPC/SSM (80:20) | 57.4 ± 1.5 | 69.5 ± 0.7 | 14.0 ± 0.0 | 13.0 ± 0.4 | 13.5 ± 0.7  | 12.0 ± 1.4  | 2.6 ± 0.1 | 17.0 ± 0.0  | 74.5 ± 0.7  | 42.1 ± 1.6  |
| DAPC/SSM (75:25) | 57.6 ± 1.5 | 77.5 ± 0.7 | 23.0 ± 1.4 | 15.3 ± 1.3 | 13.5 ± 0.7  | 15.0 ± 1.4  | 2.6 ± 0.1 | 9.5 ± 0.7   | 62.0 ± 0.0  | 46.7 ± 1.7  |
| DAPC/SSM (70:30) | 57.9 ± 1.4 | 78.5 ± 0.7 | 28.5 ± 0.7 | 17.2 ± 0.2 | 14.5 ± 0.7  | 18.5 ± 0.7  | 2.7 ± 0.1 | 7.0 ± 0.0   | 53.0 ± 0.0  | 48.2 ± 1.5  |
| DAPC/SSM (65:35) | 58.0 ± 0.7 | 79.0 ± 0.0 | 33.0 ± 1.4 | 18.4 ± 0.7 | 15.5 ± 0.7  | 20.5 ± 0.7  | 2.8 ± 0.2 | 5.0 ± 0.0   | 46.5 ± 0.7  | 48.9 ± 0.9  |
| DAPC/SSM (60:40) | 58.5 ± 0.4 | 80.0 ± 0.0 | 37.0 ± 1.4 | 18.7 ± 0.8 | 16.0 ± 0.0  | 22.5 ± 0.7  | 2.8 ± 0.1 | 4.0 ± 0.0   | 40.5 ± 0.7  | 49.9 ± 0.5  |
| DAPC/SSM (55:45) | 58.7 ± 1.0 | 81.0 ± 0.0 | 40.5 ± 0.7 | 19.4 ± 0.7 | 15.5 ± 0.7  | 24.0 ± 0.0  | 3.0 ± 0.3 | 4.0 ± 0.0   | 36.0 ± 1.4  | 50.6 ± 1.0  |
| DDPC             |            |            |            | 8.5 ± 0.3  | 21.0 ± 1.4  | 5.5 ± 0.7   | 1.9 ± 0.0 | 79.0 ± 1.4  | 94.5 ± 0.7  | 3.3 ± 0.1   |
| DDPC/SSM (95:5)  | 18.3 ± 2.5 | 10.5 ± 2.1 | 1.0 ± 0.0  | 3.4 ± 0.4  | 47.5 ± 6.4  | 28.5 ± 4.9  | 1.2 ± 0.3 | 42.5 ± 9.2  | 70.5 ± 4.9  | 4.0 ± 0.1   |
| DDPC/SSM (90:10) | 60.3 ± 0.6 | 71.0 ± 1.4 | 8.5 ± 0.7  | 6.3 ± 0.9  | 11.5 ± 0.7  | 14.0 ± 2.8  | 1.7 ± 0.0 | 17.0 ± 1.4  | 77.0 ± 4.2  | 44.0 ± 1.1  |
| DDPC/SSM (85:15) | 58.6 ± 1.0 | 82.5 ± 3.5 | 19.5 ± 3.5 | 11.0 ± 0.3 | 9.5 ± 2.1   | 11.5 ± 0.7  | 1.7 ± 0.0 | 9.0 ± 1.4   | 69.0 ± 2.8  | 49.3 ± 2.6  |
| DDPC/SSM (80:20) | 58.3 ± 0.1 | 83.5 ± 0.7 | 26.0 ± 1.4 | 14.5 ± 0.2 | 10.0 ± 0.0  | 13.0 ± 0.0  | 1.9 ± 0.1 | 6.5 ± 0.7   | 61.0 ± 1.4  | 50.2 ± 0.3  |
| DDPC/SSM (75:25) | 55.9 ± 1.8 | 86.0 ± 2.8 | 31.0 ± 4.2 | 14.0 ± 0.0 | 9.0 ± 1.4   | 13.5 ± 0.7  | 1.7 ± 0.0 | 4.5 ± 0.7   | 56.0 ± 4.2  | 49.4 ± 0.5  |
| DDPC/SSM (70:30) | 56.9 ± 0.9 | 85.0 ± 1.4 | 32.0 ± 2.8 | 14.7 ± 0.2 | 11.0 ± 1.4  | 15.5 ± 0.7  | 1.8 ± 0.1 | 4.5 ± 0.7   | 52.0 ± 1.4  | 50.0 ± 0.0  |
| DDPC/SSM (65:35) | 58.4 ± 0.6 | 85.5 ± 2.1 | 36.5 ± 2.1 | 16.4 ± 0.3 | 11.0 ± 1.4  | 16.5 ± 0.7  | 1.9 ± 0.1 | 3.5 ± 0.7   | 47.5 ± 0.7  | 51.7 ± 1.3  |
| DDPC/SSM (60:40) | 58.0 ± 0.2 | 85.0 ± 0.0 | 39.0 ± 0.0 | 17.1 ± 0.3 | 11.5 ± 0.7  | 18.0 ± 1.4  | 2.0 ± 0.0 | 3.0 ± 0.0   | 44.0 ± 1.4  | 51.5 ± 0.4  |
| DDPC/SSM (55:45) | 58.0 ± 0.5 | 86.0 ± 0.0 | 40.5 ± 2.1 | 17.3 ± 1.1 | 11.0 ± 0.0  | 17.0 ± 0.0  | 2.0 ± 0.2 | 3.0 ± 0.0   | 42.5 ± 2.1  | 51.7 ± 0.5  |

Each value is the average from at least two separate experiments ± SEM.  $\tau$ , lifetimes (ns);  $f$ , fractional intensities (%);  $\alpha$ , fractional amplitudes (%);  $\tau_{AV}$ , intensity-weighted average lifetimes (ns).

Table S7

Comparison of time-resolved fluorescence decays of tPA (1 mol%) in different bilayers at 23 °C

| Sample            | $\tau_1$   | $f_1$       | $\alpha_1$ | $\tau_2$   | $f_2$      | $\alpha_2$  | $\tau_3$  | $f_3$      | $\alpha_3$ | $\tau_{AV}$ |
|-------------------|------------|-------------|------------|------------|------------|-------------|-----------|------------|------------|-------------|
| POPC              |            |             |            | 6.7 ± 0.1  | 53.0 ± 1.4 | 37.0 ± 1.4  | 3.4 ± 0.0 | 47.0 ± 1.4 | 63.0 ± 1.4 | 5.1 ± 0.0   |
| POPC/PSPC (90:10) | 35.5 ± 5.1 | 5.0 ± 1.4   | 1.0 ± 0.0  | 6.4 ± 0.2  | 74.5 ± 0.7 | 59.5 ± 0.7  | 2.7 ± 0.0 | 20.0 ± 0.0 | 39.5 ± 0.7 | 7.1 ± 0.3   |
| POPC/PSPC (85:15) | 54.1 ± 1.9 | 21.5 ± 3.5  | 2.5 ± 0.7  | 7.2 ± 0.2  | 57.5 ± 4.9 | 51.5 ± 3.5  | 3.0 ± 0.2 | 21.0 ± 1.4 | 46.0 ± 2.8 | 16.3 ± 2.3  |
| POPC/PSPC (80:20) | 58.1 ± 0.9 | 58.5 ± 0.7  | 12.0 ± 0.0 | 8.9 ± 0.1  | 25.0 ± 0.0 | 33.0 ± 1.4  | 3.4 ± 0.1 | 16.5 ± 0.7 | 56.0 ± 1.4 | 36.8 ± 0.9  |
| POPC/PSPC (75:25) | 58.9 ± 0.4 | 69.5 ± 0.7  | 19.0 ± 0.0 | 11.4 ± 0.4 | 16.0 ± 0.0 | 22.0 ± 1.4  | 3.9 ± 0.1 | 14.5 ± 0.7 | 59.0 ± 1.4 | 43.4 ± 0.1  |
| POPC/PSPC (70:30) | 59.9 ± 0.3 | 75.0 ± 0.0  | 24.0 ± 0.0 | 15.0 ± 0.1 | 12.5 ± 0.7 | 16.0 ± 0.0  | 4.2 ± 0.0 | 13.0 ± 0.0 | 59.5 ± 0.7 | 47.2 ± 0.3  |
| POPC/PSPC (65:35) | 60.5 ± 0.0 | 78.0 ± 0.0  | 29.0 ± 1.4 | 16.1 ± 0.5 | 12.0 ± 0.0 | 16.5 ± 0.7  | 4.1 ± 0.0 | 10.0 ± 0.0 | 54.5 ± 0.7 | 49.5 ± 0.4  |
| POPC/PSPC (60:40) | 62.2 ± 0.4 | 78.5 ± 0.7  | 31.5 ± 0.7 | 18.7 ± 0.4 | 12.0 ± 0.0 | 16.0 ± 0.0  | 4.3 ± 0.0 | 9.5 ± 0.7  | 53.0 ± 1.4 | 51.6 ± 0.1  |
| POPC/PSPC (55:45) | 61.4 ± 0.5 | 82.5 ± 0.7  | 37.5 ± 0.7 | 18.8 ± 1.3 | 10.5 ± 0.7 | 16.0 ± 0.0  | 4.0 ± 0.3 | 6.5 ± 0.7  | 45.5 ± 0.7 | 52.5 ± 0.7  |
| PLPC              |            |             |            | 7.5 ± 0.1  | 24.0 ± 1.4 | 13.5 ± 0.7  | 3.6 ± 0.0 | 76.0 ± 1.4 | 86.5 ± 0.7 | 4.5 ± 0.0   |
| PLPC/PSPC (90:10) | 16.5 ± 0.5 | 3.3 ± 0.6   | 1.0 ± 0.0  | 5.2 ± 0.2  | 78.7 ± 2.9 | 65.0 ± 3.5  | 2.2 ± 0.2 | 18.0 ± 3.5 | 34.3 ± 3.8 | 5.1 ± 0.0   |
| PLPC/PSPC (85:15) | 38.5 ± 3.3 | 4.5 ± 0.7   | 1.0 ± 0.0  | 5.9 ± 0.0  | 70.5 ± 0.7 | 55.0 ± 0.0  | 2.7 ± 0.0 | 26.0 ± 0.0 | 44.0 ± 0.0 | 6.5 ± 0.4   |
| PLPC/PSPC (80:20) | 60.9 ± 0.2 | 49.5 ± 2.1  | 7.0 ± 0.0  | 7.7 ± 0.4  | 26.5 ± 2.1 | 29.5 ± 4.9  | 3.4 ± 0.2 | 24.5 ± 4.9 | 63.0 ± 5.7 | 32.8 ± 1.3  |
| PLPC/PSPC (75:25) | 62.3 ± 0.2 | 61.5 ± 0.7  | 11.5 ± 0.7 | 9.1 ± 0.5  | 17.5 ± 2.1 | 22.0 ± 2.8  | 3.6 ± 0.1 | 20.5 ± 0.7 | 66.5 ± 2.1 | 40.9 ± 0.3  |
| PLPC/PSPC (70:30) | 62.5 ± 0.8 | 73.0 ± 1.4  | 19.0 ± 1.4 | 11.9 ± 0.1 | 11.0 ± 0.0 | 14.5 ± 0.7  | 3.8 ± 0.1 | 16.0 ± 1.4 | 66.5 ± 2.1 | 47.6 ± 0.3  |
| PLPC/PSPC (65:35) | 62.6 ± 1.0 | 78.0 ± 1.4  | 24.0 ± 1.4 | 14.3 ± 0.2 | 9.5 ± 0.7  | 12.5 ± 0.7  | 4.0 ± 0.0 | 13.0 ± 1.4 | 63.5 ± 2.1 | 50.5 ± 0.0  |
| PLPC/PSPC (60:40) | 63.7 ± 0.8 | 80.0 ± 0.0  | 28.5 ± 0.7 | 18.4 ± 0.5 | 9.0 ± 0.0  | 11.5 ± 0.7  | 4.1 ± 0.1 | 11.0 ± 0.0 | 60.5 ± 0.7 | 53.0 ± 0.4  |
| PLPC/PSPC (55:45) | 64.4 ± 1.0 | 81.0 ± 0.0  | 31.5 ± 0.7 | 20.1 ± 0.6 | 9.5 ± 0.7  | 12.0 ± 0.0  | 4.2 ± 0.0 | 9.5 ± 0.7  | 56.5 ± 0.7 | 54.5 ± 0.6  |
| PAPC              |            |             |            | 6.8 ± 0.2  | 25.5 ± 0.7 | 13.5 ± 0.7  | 3.2 ± 0.1 | 74.5 ± 0.7 | 86.5 ± 0.7 | 4.1 ± 0.0   |
| PAPC/PSPC (90:10) | 45.5 ± 1.1 | 8.0 ± 0.0   | 1.0 ± 0.0  | 5.2 ± 0.1  | 62.5 ± 0.7 | 49.0 ± 1.4  | 2.4 ± 0.1 | 29.5 ± 0.7 | 50.5 ± 2.1 | 7.6 ± 0.0   |
| PAPC/PSPC (85:15) | 58.3 ± 0.6 | 32.5 ± 2.1  | 3.0 ± 0.0  | 6.1 ± 0.2  | 37.0 ± 4.2 | 34.5 ± 3.5  | 2.8 ± 0.1 | 30.5 ± 2.1 | 62.5 ± 3.5 | 22.2 ± 1.3  |
| PAPC/PSPC (80:20) | 61.3 ± 0.1 | 58.5 ± 2.1  | 9.5 ± 0.7  | 9.4 ± 0.9  | 15.0 ± 2.8 | 15.5 ± 3.5  | 3.4 ± 0.1 | 26.5 ± 0.7 | 76.0 ± 2.8 | 38.2 ± 1.0  |
| PAPC/PSPC (75:25) | 61.9 ± 0.5 | 70.5 ± 0.7  | 15.0 ± 0.0 | 11.6 ± 0.2 | 10.5 ± 0.7 | 42.5 ± 43.1 | 3.4 ± 0.0 | 19.0 ± 0.0 | 72.5 ± 0.7 | 45.4 ± 0.1  |
| PAPC/PSPC (70:30) | 62.6 ± 0.8 | 76.0 ± 0.0  | 20.5 ± 0.7 | 15.1 ± 3.1 | 9.5 ± 0.7  | 11.0 ± 1.4  | 3.5 ± 0.2 | 14.0 ± 0.0 | 68.5 ± 0.7 | 49.6 ± 1.1  |
| PAPC/PSPC (65:35) | 63.0 ± 0.5 | 78.5 ± 0.7  | 25.0 ± 1.4 | 16.9 ± 0.6 | 9.0 ± 0.0  | 11.0 ± 0.0  | 3.6 ± 0.0 | 11.5 ± 0.7 | 65.0 ± 1.4 | 51.6 ± 0.1  |
| PAPC/PSPC (60:40) | 63.9 ± 0.5 | 82.0 ± 0.0  | 31.0 ± 1.4 | 18.5 ± 1.3 | 9.0 ± 0.0  | 12.0 ± 0.0  | 3.6 ± 0.1 | 8.5 ± 0.7  | 57.0 ± 1.4 | 54.4 ± 0.8  |
| PAPC/PSPC (55:45) | 63.8 ± 0.1 | 83.0 ± 0.0  | 33.5 ± 0.7 | 19.9 ± 1.0 | 9.5 ± 0.7  | 12.0 ± 0.0  | 3.7 ± 0.0 | 8.0 ± 0.0  | 54.5 ± 0.7 | 54.9 ± 0.1  |
| PDPC              |            |             |            | 5.4 ± 0.2  | 43.5 ± 2.1 | 14.5 ± 0.7  | 1.2 ± 0.0 | 56.5 ± 2.1 | 85.5 ± 0.7 | 3.0 ± 0.0   |
| PDPC/PSPC (90:10) | 13.6 ± 4.2 | 12.0 ± 2.8  | 1.5 ± 0.7  | 3.3 ± 0.3  | 48.5 ± 0.7 | 22.5 ± 0.7  | 0.8 ± 0.0 | 39.5 ± 2.1 | 76.5 ± 2.1 | 3.5 ± 0.3   |
| PDPC/PSPC (85:15) | 50.9 ± 1.8 | 30.5 ± 4.9  | 1.5 ± 0.7  | 4.2 ± 0.2  | 36.0 ± 2.8 | 19.0 ± 0.0  | 0.9 ± 0.0 | 33.5 ± 2.1 | 80.0 ± 0.0 | 17.5 ± 2.9  |
| PDPC/PSPC (80:20) | 54.8 ± 0.0 | 54.5 ± 2.1  | 3.5 ± 0.7  | 4.4 ± 0.4  | 23.5 ± 0.7 | 18.0 ± 1.4  | 0.9 ± 0.1 | 21.5 ± 2.1 | 78.5 ± 2.1 | 31.1 ± 1.4  |
| PDPC/PSPC (75:25) | 55.3 ± 0.9 | 64.5 ± 10.6 | 5.0 ± 2.8  | 4.7 ± 0.4  | 18.5 ± 4.9 | 17.5 ± 0.7  | 0.9 ± 0.1 | 17.0 ± 5.7 | 77.5 ± 3.5 | 36.6 ± 6.3  |
| PDPC/PSPC (70:30) | 55.5 ± 0.7 | 77.5 ± 0.7  | 10.0 ± 0.0 | 5.5 ± 0.5  | 12.0 ± 0.0 | 16.5 ± 0.7  | 1.0 ± 0.1 | 10.5 ± 0.7 | 73.5 ± 0.7 | 43.7 ± 0.1  |
| PDPC/PSPC (65:35) | 56.3 ± 0.1 | 81.5 ± 2.1  | 13.0 ± 2.8 | 6.1 ± 1.1  | 9.5 ± 0.7  | 15.0 ± 1.4  | 1.1 ± 0.1 | 8.5 ± 0.7  | 72.0 ± 1.4 | 46.8 ± 1.0  |
| PDPC/PSPC (60:40) | 56.3 ± 0.9 | 87.0 ± 1.4  | 21.5 ± 3.5 | 8.0 ± 0.7  | 7.5 ± 0.7  | 13.0 ± 0.0  | 1.2 ± 0.0 | 6.0 ± 1.4  | 65.5 ± 3.5 | 49.5 ± 1.6  |
| PDPC/PSPC (55:45) | 57.1 ± 0.8 | 87.5 ± 0.7  | 22.0 ± 1.4 | 7.9 ± 0.4  | 7.0 ± 0.0  | 12.5 ± 0.7  | 1.1 ± 0.0 | 5.5 ± 0.7  | 65.5 ± 0.7 | 50.7 ± 0.2  |

Each value is the average from at least two separate experiments ± SEM.  $\tau$ , lifetimes (ns);  $f$ , fractional intensities (%);  $\alpha$ , fractional amplitudes (%);  $\tau_{AV}$ , intensity-weighted average lifetimes (ns).

Table S8

Comparison of time-resolved fluorescence decays of tPA (1 mol%) in different bilayers at 23 °C

| Sample            | $\tau_1$   | $f_1$       | $\alpha_1$  | $\tau_2$   | $f_2$      | $\alpha_2$  | $\tau_3$  | $f_3$      | $\alpha_3$  | $\tau_{AV}$ |
|-------------------|------------|-------------|-------------|------------|------------|-------------|-----------|------------|-------------|-------------|
| DOPC              |            |             |             | 6.7 ± 0.1  | 21.0 ± 0.0 | 11.0 ± 0.0  | 3.1 ± 0.0 | 79.0 ± 0.0 | 89.0 ± 0.0  | 3.8 ± 0.0   |
| DOPC/PSPC (90:10) | 15.2 ± 0.8 | 4.0 ± 0.0   | 1.0 ± 0.0   | 4.3 ± 0.0  | 79.0 ± 2.8 | 66.0 ± 2.8  | 1.9 ± 0.1 | 17.0 ± 2.8 | 33.0 ± 2.8  | 4.3 ± 0.0   |
| DOPC/PSPC (85:15) | 45.3 ± 3.8 | 7.0 ± 1.4   | 1.0 ± 0.0   | 5.0 ± 0.1  | 64.0 ± 2.8 | 51.5 ± 2.1  | 2.4 ± 0.1 | 29.0 ± 1.4 | 48.0 ± 1.4  | 7.1 ± 1.0   |
| DOPC/PSPC (80:20) | 60.3 ± 0.1 | 65.0 ± 1.4  | 11.0 ± 1.4  | 7.8 ± 1.3  | 13.0 ± 4.2 | 18.0 ± 7.1  | 3.1 ± 0.3 | 22.0 ± 2.8 | 71.5 ± 6.4  | 40.8 ± 1.0  |
| DOPC/PSPC (75:25) | 61.4 ± 0.3 | 74.0 ± 1.4  | 16.0 ± 1.4  | 8.6 ± 0.9  | 10.5 ± 2.1 | 16.0 ± 4.2  | 3.1 ± 0.2 | 16.0 ± 1.4 | 68.0 ± 2.8  | 46.7 ± 0.5  |
| DOPC/PSPC (70:30) | 63.3 ± 0.1 | 78.5 ± 0.7  | 20.0 ± 1.4  | 12.3 ± 0.8 | 7.5 ± 0.7  | 9.5 ± 0.7   | 3.3 ± 0.0 | 14.5 ± 0.7 | 70.0 ± 0.0  | 50.9 ± 0.5  |
| DOPC/PSPC (65:35) | 64.3 ± 0.3 | 81.5 ± 0.7  | 25.5 ± 0.7  | 16.8 ± 1.3 | 7.0 ± 0.0  | 8.5 ± 0.7   | 3.5 ± 0.1 | 11.5 ± 0.7 | 65.5 ± 0.7  | 54.0 ± 0.0  |
| DOPC/PSPC (60:40) | 62.0 ± 1.6 | 88.0 ± 1.4  | 42.0 ± 5.7  | 19.1 ± 1.7 | 6.0 ± 0.0  | 9.0 ± 0.0   | 3.6 ± 0.1 | 6.0 ± 1.4  | 49.0 ± 5.7  | 55.9 ± 0.5  |
| DOPC/PSPC (55:45) | 64.5 ± 1.0 | 86.0 ± 1.4  | 35.5 ± 3.5  | 19.4 ± 0.2 | 7.5 ± 0.7  | 10.0 ± 0.0  | 3.5 ± 0.1 | 7.5 ± 0.7  | 54.5 ± 3.5  | 56.9 ± 0.1  |
| DLPC              |            |             |             | 5.6 ± 0.1  | 27.5 ± 0.7 | 10.5 ± 0.7  | 1.7 ± 0.0 | 72.5 ± 0.7 | 89.5 ± 0.7  | 2.8 ± 0.0   |
| DLPC/PSPC (95:5)  | 9.3 ± 0.3  | 6.5 ± 0.7   | 1.5 ± 0.7   | 2.9 ± 0.0  | 65.5 ± 2.1 | 47.5 ± 2.1  | 1.1 ± 0.0 | 27.5 ± 2.1 | 51.0 ± 2.8  | 2.8 ± 0.1   |
| DLPC/PSPC (90:10) | 56.6 ± 0.3 | 29.5 ± 3.5  | 2.0 ± 0.0   | 4.0 ± 0.1  | 36.0 ± 1.4 | 28.5 ± 0.7  | 1.5 ± 0.1 | 34.5 ± 2.1 | 70.5 ± 0.7  | 18.8 ± 1.5  |
| DLPC/PSPC (85:15) | 60.4 ± 0.5 | 59.5 ± 3.5  | 5.5 ± 0.7   | 5.2 ± 0.4  | 17.0 ± 0.0 | 18.5 ± 2.1  | 1.8 ± 0.0 | 23.5 ± 3.5 | 75.5 ± 3.5  | 37.2 ± 1.9  |
| DLPC/PSPC (80:20) | 60.1 ± 0.0 | 73.5 ± 2.1  | 10.5 ± 0.7  | 5.6 ± 0.5  | 11.5 ± 2.1 | 17.5 ± 3.5  | 1.7 ± 0.1 | 15.0 ± 0.0 | 72.5 ± 2.1  | 45.2 ± 1.2  |
| DLPC/PSPC (75:25) | 61.5 ± 1.0 | 78.0 ± 1.4  | 13.0 ± 0.0  | 6.7 ± 0.5  | 9.0 ± 0.0  | 14.0 ± 1.4  | 1.8 ± 0.1 | 13.0 ± 1.4 | 73.0 ± 1.4  | 48.8 ± 1.3  |
| DLPC/PSPC (70:30) | 61.8 ± 0.0 | 83.0 ± 0.0  | 18.0 ± 1.4  | 8.7 ± 2.5  | 7.5 ± 0.7  | 11.5 ± 3.5  | 1.9 ± 0.1 | 10.0 ± 0.0 | 70.0 ± 2.8  | 51.8 ± 0.1  |
| DLPC/PSPC (65:35) | 62.1 ± 0.7 | 85.5 ± 2.1  | 22.0 ± 0.0  | 9.0 ± 3.3  | 6.5 ± 0.7  | 12.5 ± 3.5  | 1.9 ± 0.2 | 8.0 ± 1.4  | 66.0 ± 4.2  | 53.9 ± 0.0  |
| DLPC/PSPC (60:40) | 62.2 ± 0.9 | 87.0 ± 1.4  | 24.5 ± 0.7  | 9.2 ± 3.9  | 6.5 ± 0.7  | 13.0 ± 4.2  | 1.9 ± 0.2 | 6.5 ± 0.7  | 62.5 ± 3.5  | 54.7 ± 0.4  |
| DLPC/PSPC (55:45) | 62.2 ± 0.1 | 87.5 ± 0.7  | 26.0 ± 1.4  | 9.4 ± 4.1  | 6.0 ± 0.0  | 13.5 ± 4.9  | 1.8 ± 0.2 | 6.0 ± 0.0  | 60.0 ± 2.8  | 55.3 ± 0.1  |
| DAPC              |            |             |             | 6.8 ± 0.0  | 19.5 ± 2.1 | 6.5 ± 0.7   | 2.1 ± 0.0 | 80.5 ± 2.1 | 93.5 ± 0.7  | 3.0 ± 0.0   |
| DAPC/PSPC (95:5)  | 14.2 ± 5.2 | 30.0 ± 35.4 | 11.0 ± 14.1 | 6.9 ± 5.2  | 57.0 ± 2.8 | 30.0 ± 12.7 | 1.8 ± 0.7 | 41.0 ± 5.7 | 70.0 ± 12.7 | 3.3 ± 0.2   |
| DAPC/PSPC (90:10) | 59.1 ± 1.4 | 35.5 ± 2.1  | 2.0 ± 0.0   | 6.2 ± 0.2  | 17.0 ± 0.0 | 11.0 ± 0.0  | 2.2 ± 0.1 | 48.0 ± 1.4 | 87.0 ± 0.0  | 22.9 ± 1.5  |
| DAPC/PSPC (85:15) | 61.4 ± 1.1 | 72.5 ± 3.5  | 11.0 ± 1.4  | 8.3 ± 0.7  | 8.0 ± 1.4  | 9.0 ± 0.0   | 2.3 ± 0.0 | 20.0 ± 2.8 | 80.5 ± 2.1  | 45.4 ± 1.1  |
| DAPC/PSPC (80:20) | 61.2 ± 0.2 | 85.5 ± 0.7  | 22.0 ± 0.0  | 9.4 ± 1.4  | 5.0 ± 0.0  | 9.0 ± 1.4   | 2.2 ± 0.1 | 9.5 ± 0.7  | 69.0 ± 1.4  | 52.8 ± 0.3  |
| DAPC/PSPC (75:25) | 62.2 ± 0.9 | 85.0 ± 1.4  | 23.5 ± 0.7  | 10.8 ± 4.4 | 6.0 ± 0.0  | 10.0 ± 2.8  | 2.3 ± 0.2 | 8.5 ± 0.7  | 66.0 ± 2.8  | 53.9 ± 0.4  |
| DAPC/PSPC (70:30) | 63.2 ± 0.5 | 87.5 ± 0.7  | 32.0 ± 1.4  | 16.7 ± 0.3 | 6.0 ± 0.0  | 8.5 ± 0.7   | 2.5 ± 0.0 | 6.5 ± 0.7  | 60.0 ± 1.4  | 56.6 ± 0.1  |
| DAPC/PSPC (65:35) | 64.1 ± 0.3 | 87.5 ± 0.7  | 34.0 ± 4.2  | 17.5 ± 2.9 | 6.5 ± 0.7  | 9.0 ± 0.0   | 2.5 ± 0.1 | 5.5 ± 0.7  | 57.0 ± 4.2  | 57.5 ± 0.2  |
| DAPC/PSPC (60:40) | 63.8 ± 0.2 | 88.5 ± 0.7  | 38.0 ± 5.7  | 18.6 ± 3.0 | 7.0 ± 0.0  | 10.0 ± 0.0  | 2.6 ± 0.2 | 4.5 ± 0.7  | 51.5 ± 4.9  | 57.7 ± 0.9  |
| DAPC/PSPC (55:45) | 64.1 ± 0.0 | 88.5 ± 0.7  | 41.5 ± 3.5  | 19.5 ± 0.4 | 7.0 ± 0.0  | 11.0 ± 0.0  | 2.6 ± 0.1 | 4.5 ± 0.7  | 47.5 ± 3.5  | 58.3 ± 0.6  |
| DDPC              |            |             |             | 5.6 ± 0.0  | 31.5 ± 0.7 | 11.5 ± 0.7  | 1.6 ± 0.1 | 68.5 ± 0.7 | 88.5 ± 0.7  | 2.8 ± 0.0   |
| DDPC/PSPC (95:5)  | 40.3 ± 1.9 | 12.0 ± 1.4  | 1.0 ± 0.0   | 3.6 ± 0.0  | 43.5 ± 0.7 | 24.0 ± 0.0  | 1.2 ± 0.0 | 44.5 ± 0.7 | 76.0 ± 0.0  | 6.9 ± 0.8   |
| DDPC/PSPC (90:10) | 59.4 ± 0.2 | 63.5 ± 2.1  | 5.5 ± 0.7   | 5.1 ± 0.5  | 15.5 ± 2.1 | 16.0 ± 1.4  | 1.4 ± 0.2 | 21.0 ± 0.0 | 78.5 ± 0.7  | 38.7 ± 1.2  |
| DDPC/PSPC (85:15) | 61.1 ± 0.6 | 79.5 ± 3.5  | 12.0 ± 2.8  | 6.0 ± 1.0  | 8.5 ± 2.1  | 13.5 ± 2.1  | 1.4 ± 0.1 | 11.0 ± 1.4 | 74.5 ± 0.7  | 49.5 ± 2.6  |
| DDPC/PSPC (80:20) | 61.2 ± 0.1 | 84.0 ± 1.4  | 16.5 ± 3.5  | 7.8 ± 2.2  | 7.0 ± 1.4  | 11.0 ± 2.8  | 1.5 ± 0.2 | 8.5 ± 0.7  | 72.0 ± 1.4  | 52.2 ± 1.0  |
| DDPC/PSPC (75:25) | 60.9 ± 0.4 | 88.5 ± 0.7  | 27.0 ± 1.4  | 10.8 ± 0.2 | 5.5 ± 0.7  | 9.5 ± 0.7   | 1.6 ± 0.0 | 5.5 ± 0.7  | 63.5 ± 2.1  | 54.8 ± 0.1  |
| DDPC/PSPC (70:30) | 61.9 ± 0.6 | 88.5 ± 0.7  | 25.5 ± 4.9  | 10.5 ± 2.2 | 6.0 ± 0.0  | 10.5 ± 0.7  | 1.6 ± 0.1 | 5.5 ± 0.7  | 64.0 ± 4.2  | 55.4 ± 0.1  |
| DDPC/PSPC (65:35) | 62.1 ± 0.1 | 89.5 ± 0.7  | 30.0 ± 2.8  | 12.0 ± 0.6 | 6.0 ± 0.0  | 10.0 ± 0.0  | 1.6 ± 0.0 | 4.5 ± 0.7  | 60.0 ± 2.8  | 56.3 ± 0.3  |
| DDPC/PSPC (60:40) | 61.7 ± 0.5 | 90.5 ± 0.7  | 38.5 ± 3.5  | 15.6 ± 0.6 | 6.0 ± 0.0  | 10.0 ± 0.0  | 1.8 ± 0.0 | 3.5 ± 0.7  | 51.0 ± 2.8  | 56.8 ± 0.1  |
| DDPC/PSPC (55:45) | 62.4 ± 0.3 | 90.5 ± 0.7  | 38.5 ± 4.9  | 15.3 ± 1.7 | 6.0 ± 0.0  | 10.5 ± 0.7  | 1.8 ± 0.1 | 3.5 ± 0.7  | 51.0 ± 5.7  | 57.4 ± 0.2  |

Each value is the average from at least two separate experiments ± SEM.  $\tau$ , lifetimes (ns);  $f$ , fractional intensities (%);  $\alpha$ , fractional amplitudes (%);  $\tau_{AV}$ , intensity-weighted average lifetimes (ns).

Table S9

Measured polydispersity and Z-average values for multilamellar vesicles prepared from PSPC and the different unsaturated PC:s. The samples were hydrated and bath sonicates as described under Materials and Methods. Each value is the calculated average based on 45 scans of one sample.

| <u>Sample Composition</u> | <u>PDI</u> | <u>Z-average (nm)</u> |
|---------------------------|------------|-----------------------|
| PSPC (100 %)              | 0.29       | 994                   |
| PSPC/POPC (45/55 by mol)  | 0.42       | 822                   |
| PSPC/PLPC (45/55 by mol)  | 0.36       | 1002                  |
| PSPC/PAPC (45/55 by mol)  | 0.67       | 1235                  |
| PSPC/PDPC (45/55 by mol)  | 0.54       | 423                   |
| PSPC/DOPC (45/55 by mol)  | 0.34       | 918                   |
| PSPC/DLPC (45/55 by mol)  | 0.29       | 844                   |
| PSPC/DAPC (45/55 by mol)  | 0.18       | 502                   |
| PSPC/DDPC (45/55 by mol)  | 0.44       | 304                   |

Table S10. Phase transition enthalpies for PSM and DPPC, and for their mixtures with unsaturated phosphatidylcholines. The lipid compositions were either 100 % PSM or DPPC; or 45 mol% saturated phospholipid in 55 mol% unsaturated PC. The total lipid concentration was 2-3 mM. In all bilayer systems, the molar enthalpy was calculated based on the saturated PC concentration only. DSC scans were recorded between 0 and 70 °C, with a temperature gradient of 1 °C/min. Data analysis was performed with Origin software. Since the peaks were broad, subtracting the correct baseline was not trivial, and will affect the measured enthalpies (approximately + 20%).

Composition    Enthalpy (kJ/mol)

|           |             |
|-----------|-------------|
| PSM       | 26.5 (100%) |
| PSM/POPC  | 7.5 (28%)   |
| PSM/PLPC  | 6.6 (25%)   |
| PSM/PAPC  | 6.8 (26%)   |
| PSM/PDPC  | 8.7 (33%)   |
| PSM/DOPC  | 10.7 (40%)  |
| PSM/DLPC  | 17.0 (64%)  |
| PSM/DAPC  | 12.3 (47%)  |
| PSM/DDPC  | 14.0 (53%)  |
|           |             |
| DPPC      | 34.6 (100%) |
| DPPC/POPC | 7.6 (22%)   |
| DPPC/PLPC | 14.9 (43%)  |
| DPPC/PAPC | 17.3 (50%)  |
| DPPC/PDPC | 13.3 (38%)  |
| DPPC/DOPC | 8.6 (25%)   |
| DPPC/DLPC | 16.5 (48%)  |
| DPPC/DAPC | 12.1 (35%)  |
| DPPC/DDPC | 17.9 (52%)  |

---

The value in parenthesis is the percentage of the enthalpy relative to the pure saturated PC enthalpy.
